# Supplementary material for: Simultaneous factor analysis of organic particle and gas mass spectra: AMS and PTR-MS measurements at an urban site
Source: Copernicus journal article supplement (doi:10.5194/acp-10-1969-2010), 2010-02-19
Supplement: Supplementary file [file acp-10-1969-2010-supplement.pdf]

1 **Simultaneous factor analysis of organic particle and gas**  
2 **mass spectra: AMS and PTR-MS measurements at an**  
3 **urban site**

4

5 **J. G. Slowik<sup>1,3</sup>, A. Vlasenko<sup>1,3</sup>, M. McGuire<sup>2,3</sup>, G. J. Evans<sup>2,3</sup>, and J. P. D.**  
6 **Abbatt<sup>1,3</sup>**

7 [1]{Department of Chemistry, University of Toronto, Toronto, Canada}

8 [2]{Department of Chemical Engineering and Applied Chemistry, University of Toronto,  
9 Toronto, Canada}

10 [3]{Southern Ontario Centre for Atmospheric Aerosol Research, University of Toronto,  
11 Toronto, Canada}

12 Correspondence to: J. P. D. Abbatt ([jabbatt@chem.utoronto.ca](mailto:jabbatt@chem.utoronto.ca))

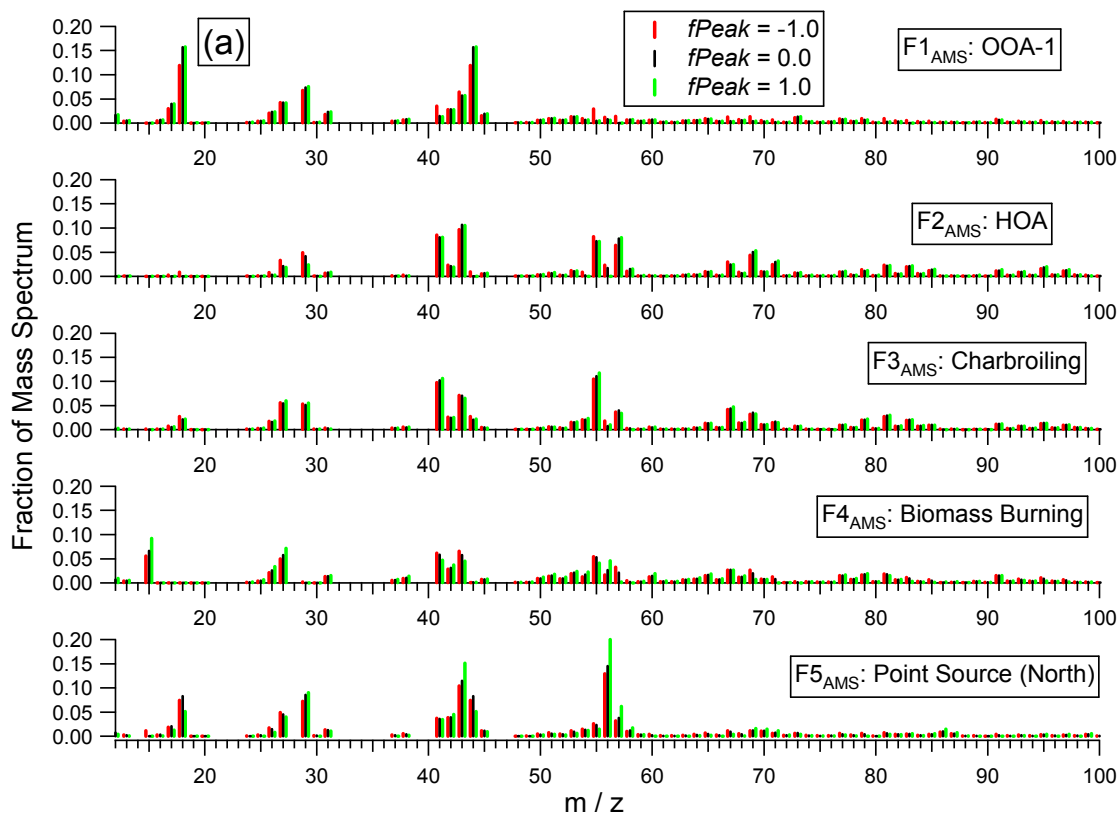

1

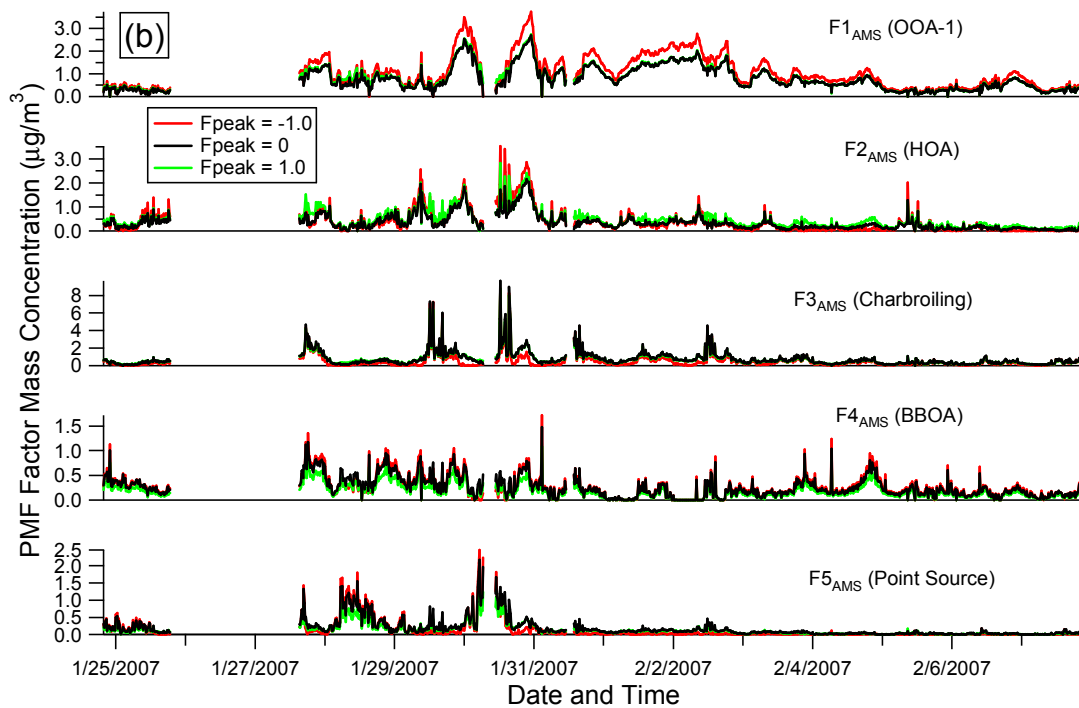

2

3 Figure S1. Factor mass spectra (a) and time series (b) for the solutions to the AMS  
 4 dataset at  $fPeak = -1.0$  (red), 0 (black), and 1.0 (green).

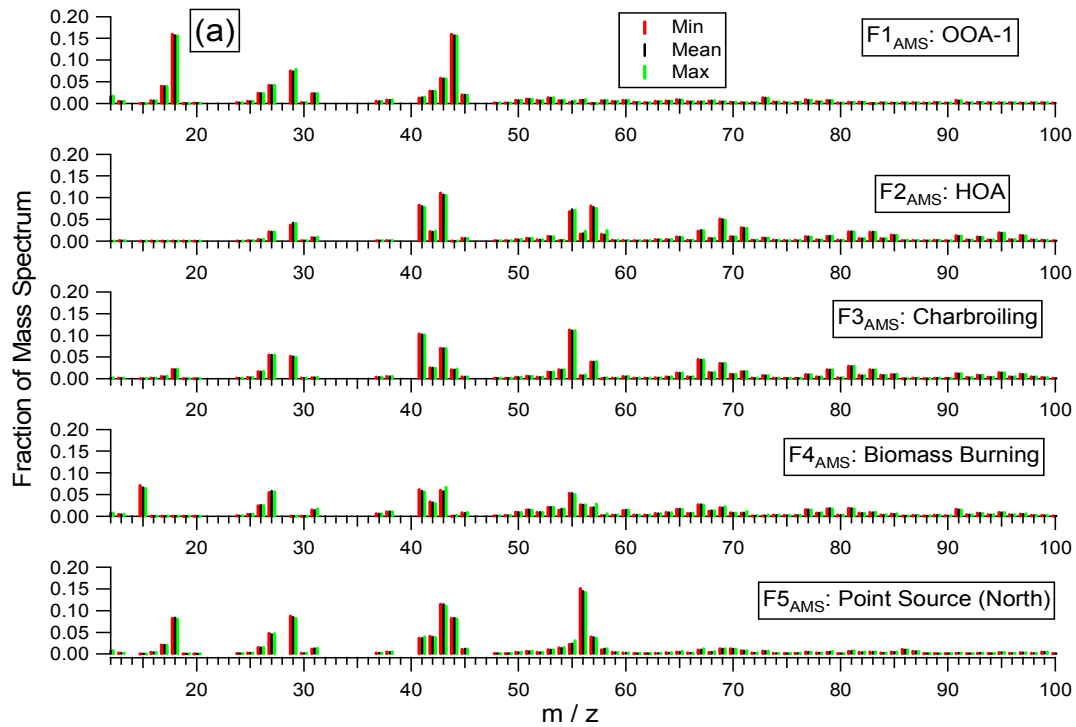

1

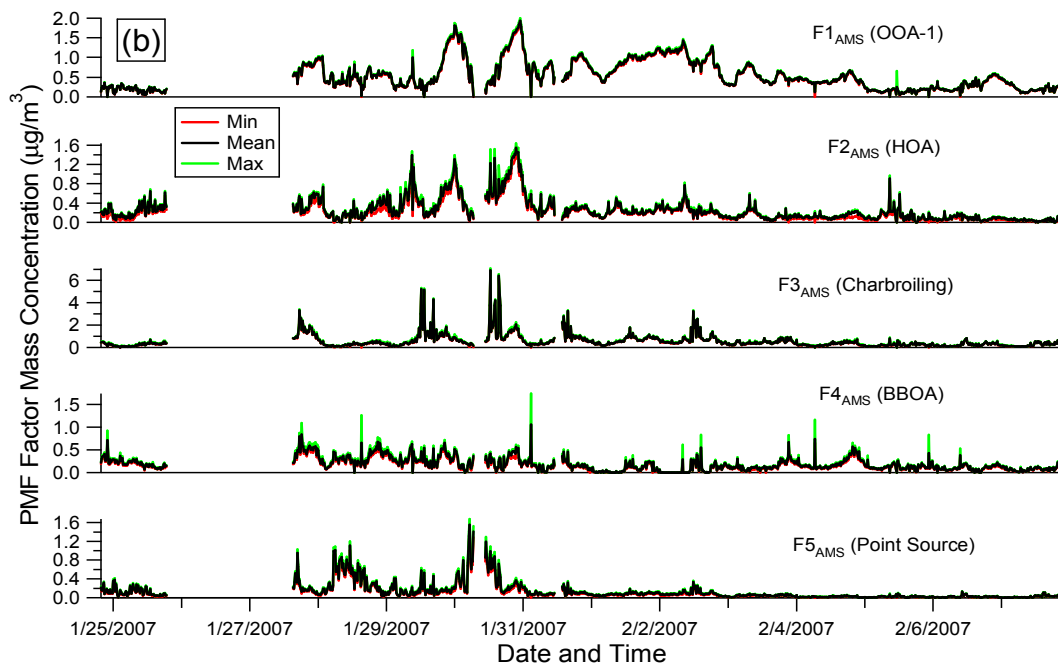

2

3 Figure S2. Factor mass spectra (a) and time series (b) for the 5-factor solution to the  
 4 AMS dataset for 98 convergent runs generated from 100 random starting points. The  
 5 mean, maximum, and minimum values for each  $m/z$  and time point are shown.

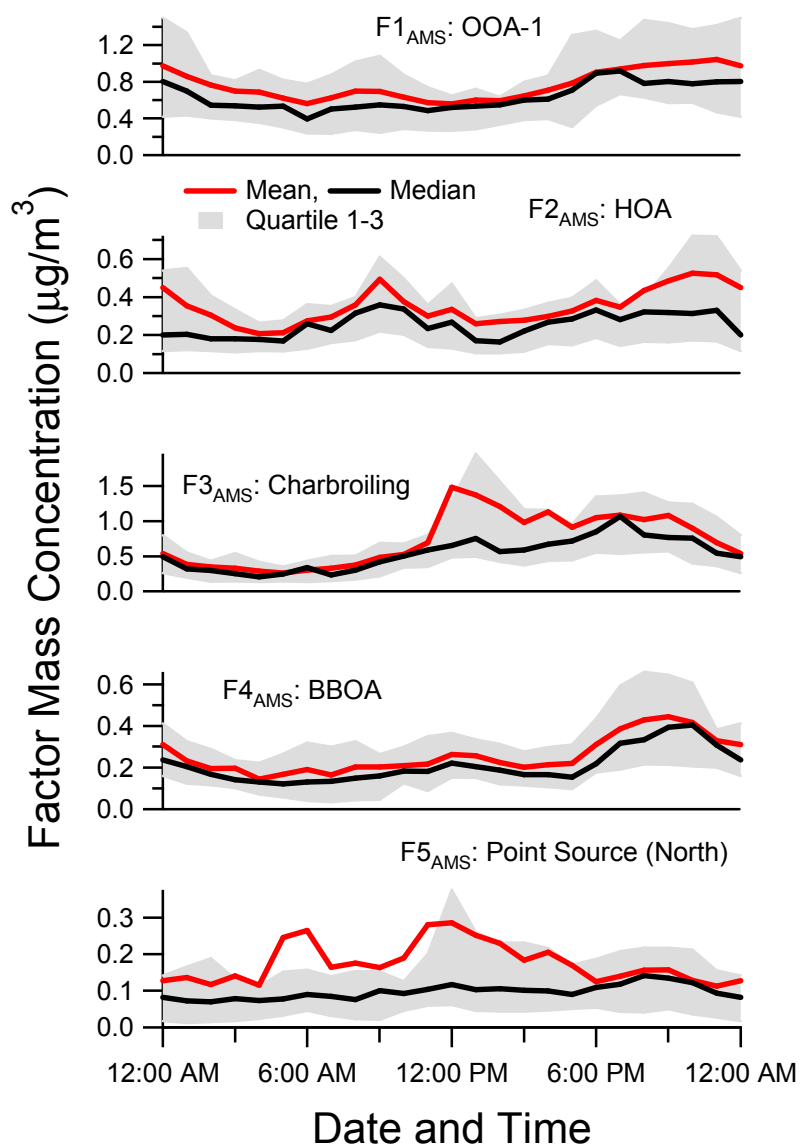

1

2 Figure S3. Hourly mean (red) and median (black) factor concentrations for the AMS  
 3 dataset. Gray shading indicates the region bounded by the 1<sup>st</sup> and 3<sup>rd</sup> quartiles.

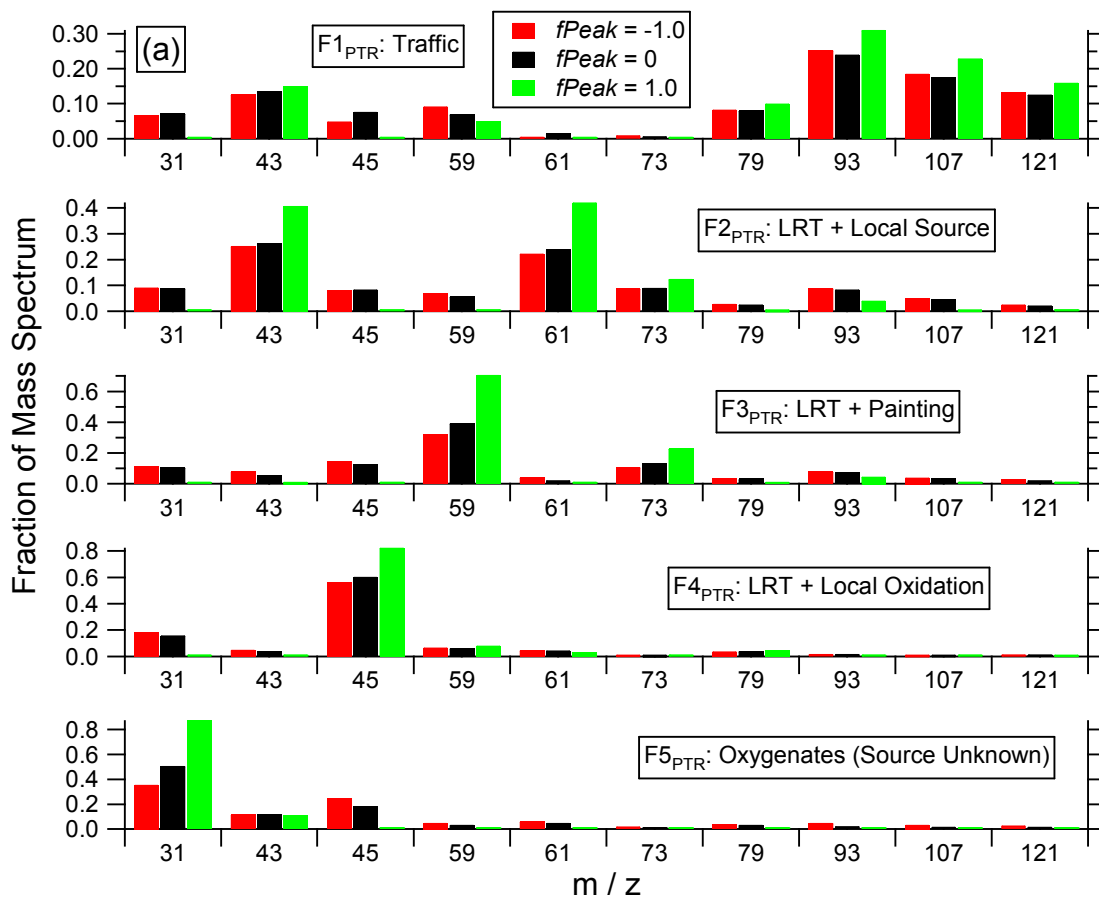

1

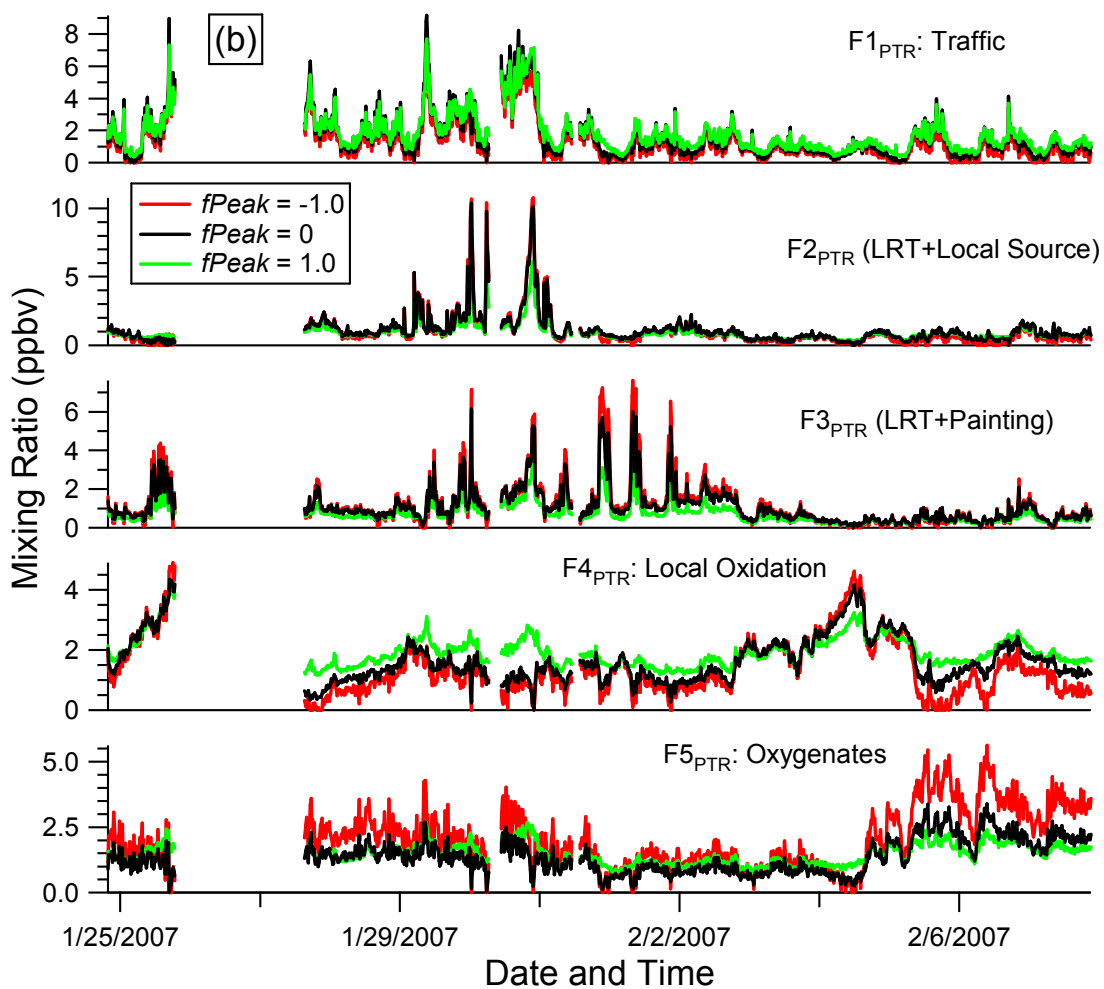

1

2 Figure S4. Factor mass spectra (a) and time series (b) for the solutions to the PTR-MS  
 3 dataset at  $fPeak = -1.0$  (red), 0 (black), and 1.0 (green). Differences between the  
 4 solutions occur primarily in the apportionment of acetaldehyde ( $m/z$  45), which in the  
 5  $fPeak = 1.0$  solution is attributed more strongly to the local oxidation factor.

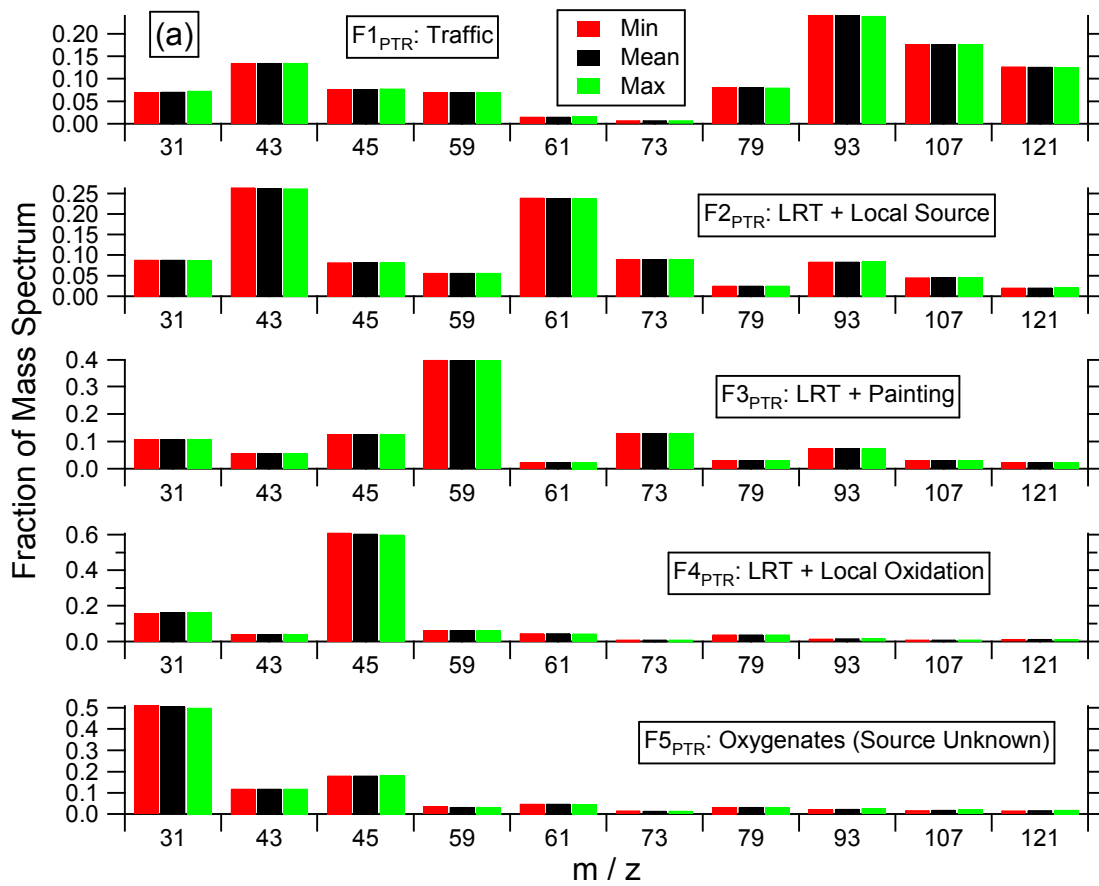

1

2

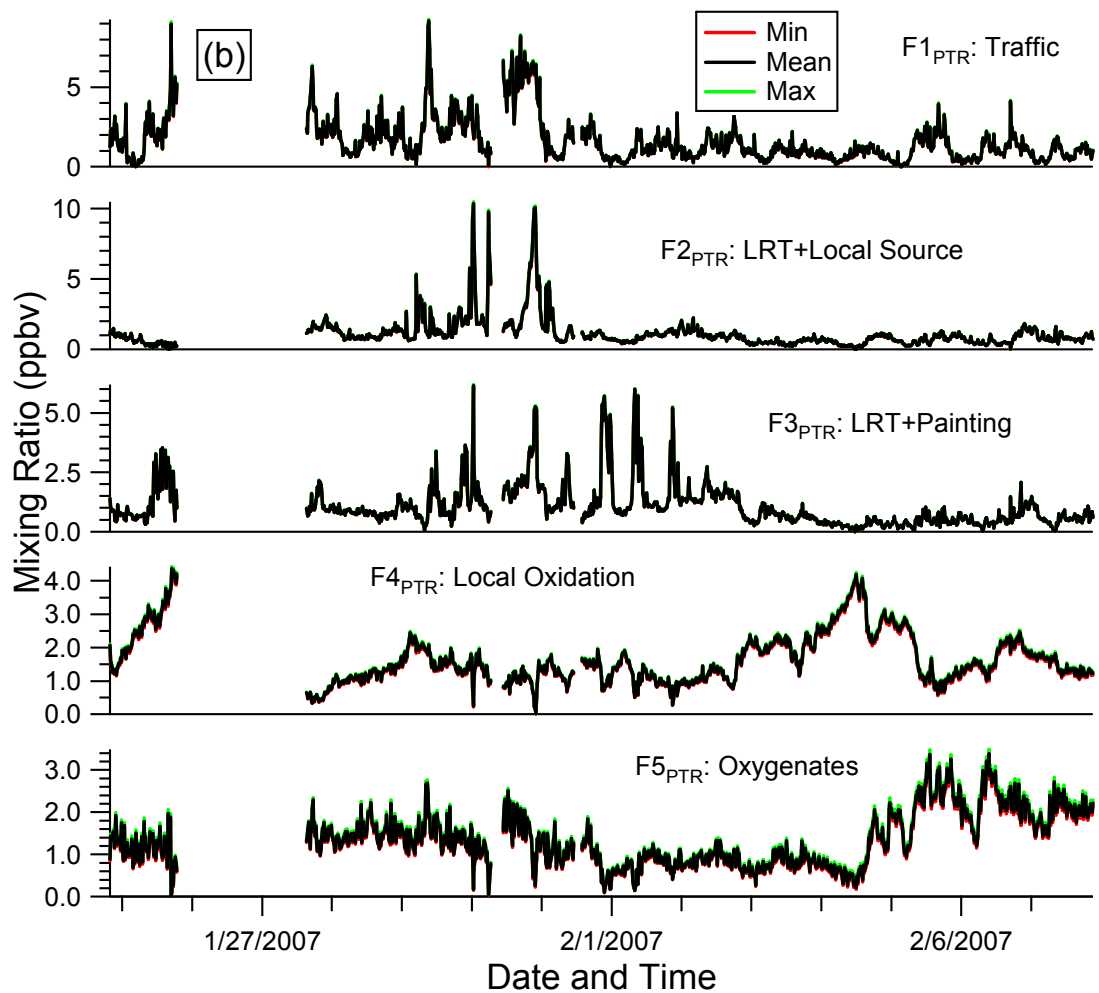

1

2 Figure S5. Factor mass spectra (a) and time series (b) for the 5-factor solution to the  
 3 PTR-MS dataset generated from 100 random starting points. The mean, maximum, and  
 4 minimum values for each  $m/z$  and time point are shown.



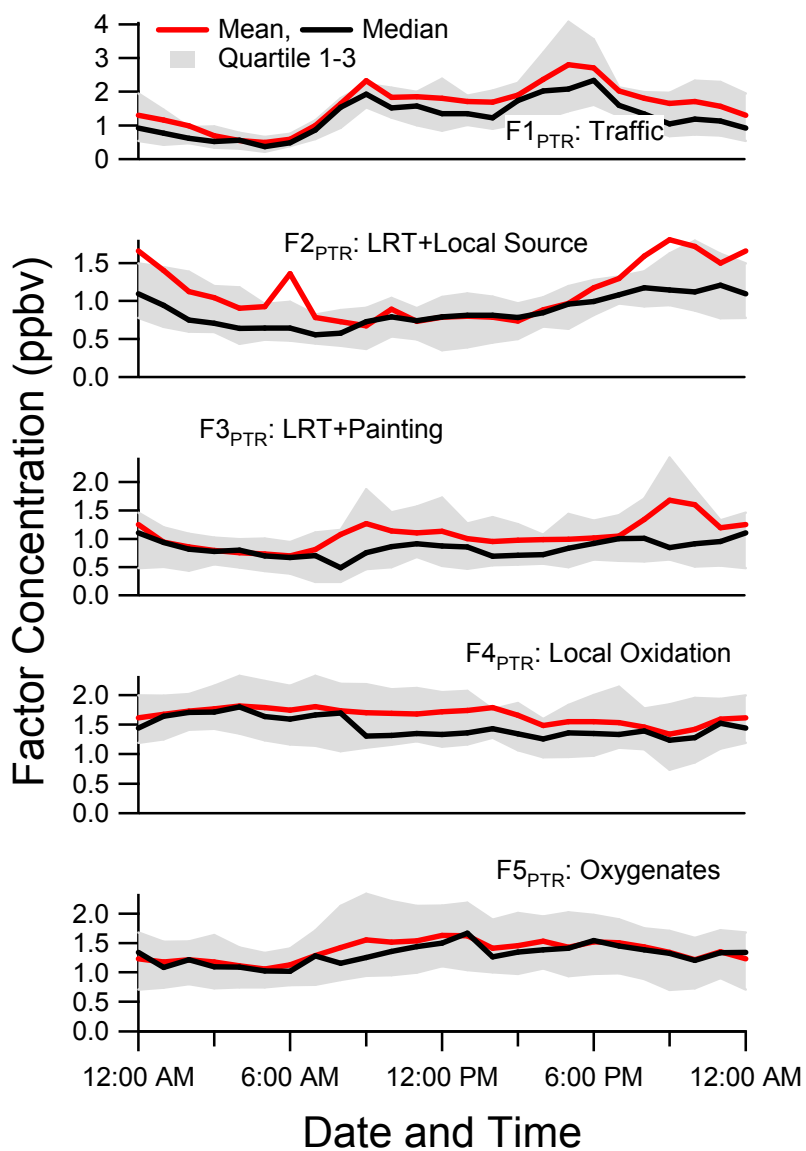

1

2 Figure S6. Hourly mean (red) and median (black) factor concentrations for the PTR-MS  
 3 dataset. Gray shading indicates the region bounded by the 1<sup>st</sup> and 3rd quartiles.

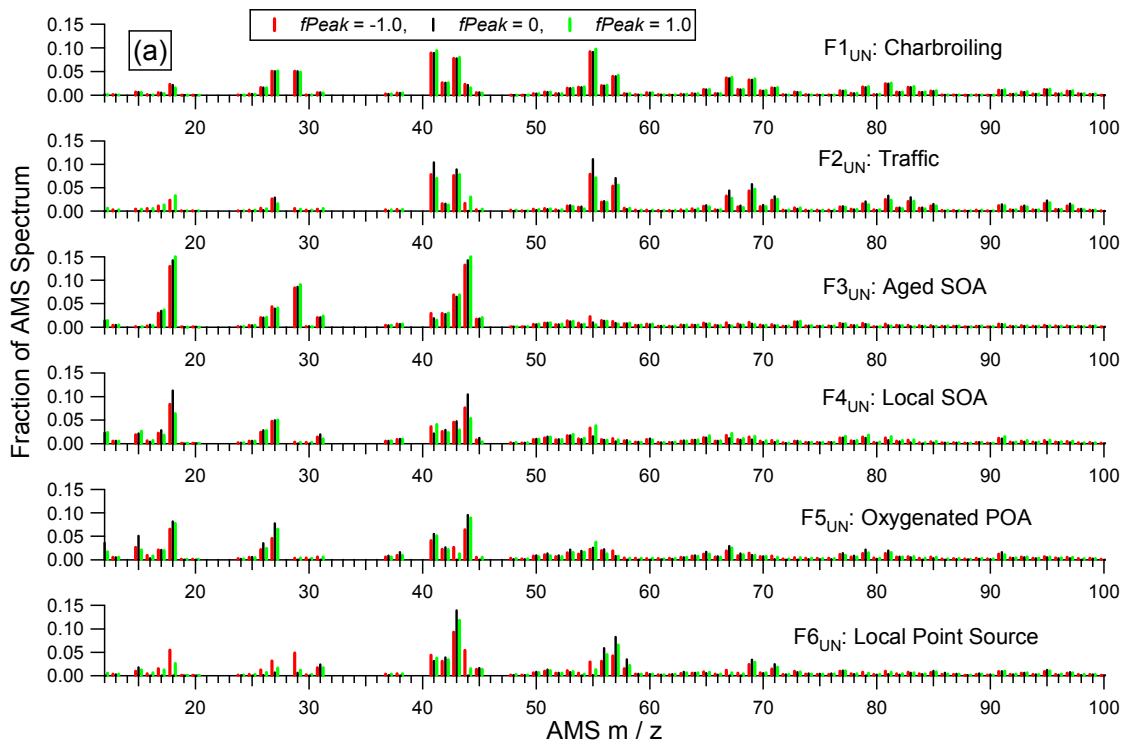

1

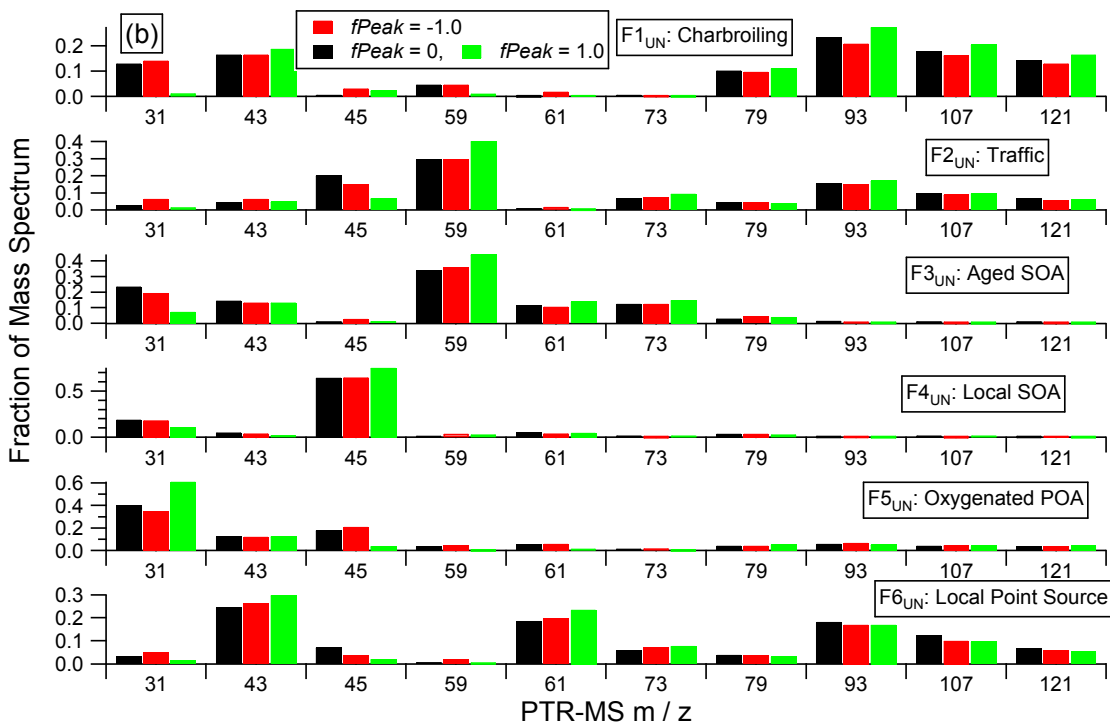

2

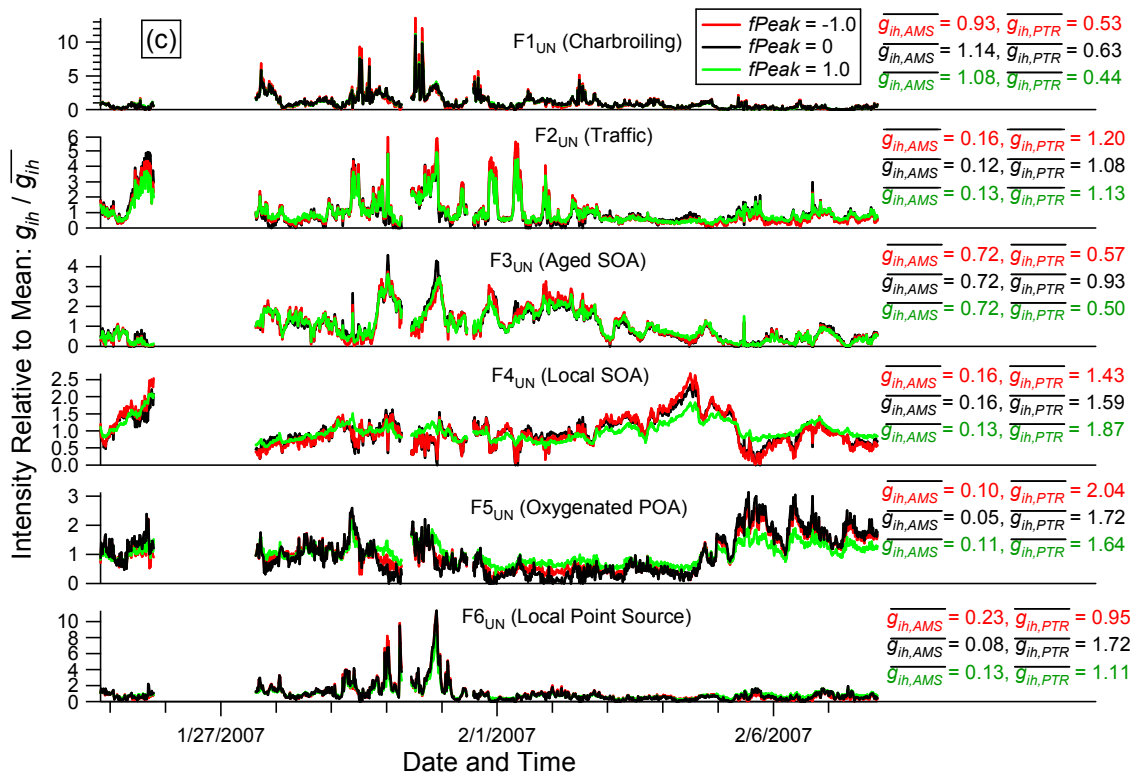

1

2 Figure S7. Factor mass spectra (a,b) and time series (c) as a function of  $fPeak$  for the 6-  
 3 factor solution to the unified dataset. Units for  $\overline{g_{ih,AMS}}$  and  $\overline{g_{ih,PTR}}$  are  $\mu\text{g}/\text{m}^3$  and ppbv,  
 4 respectively. Solutions are similar, independent of  $fPeak$ .

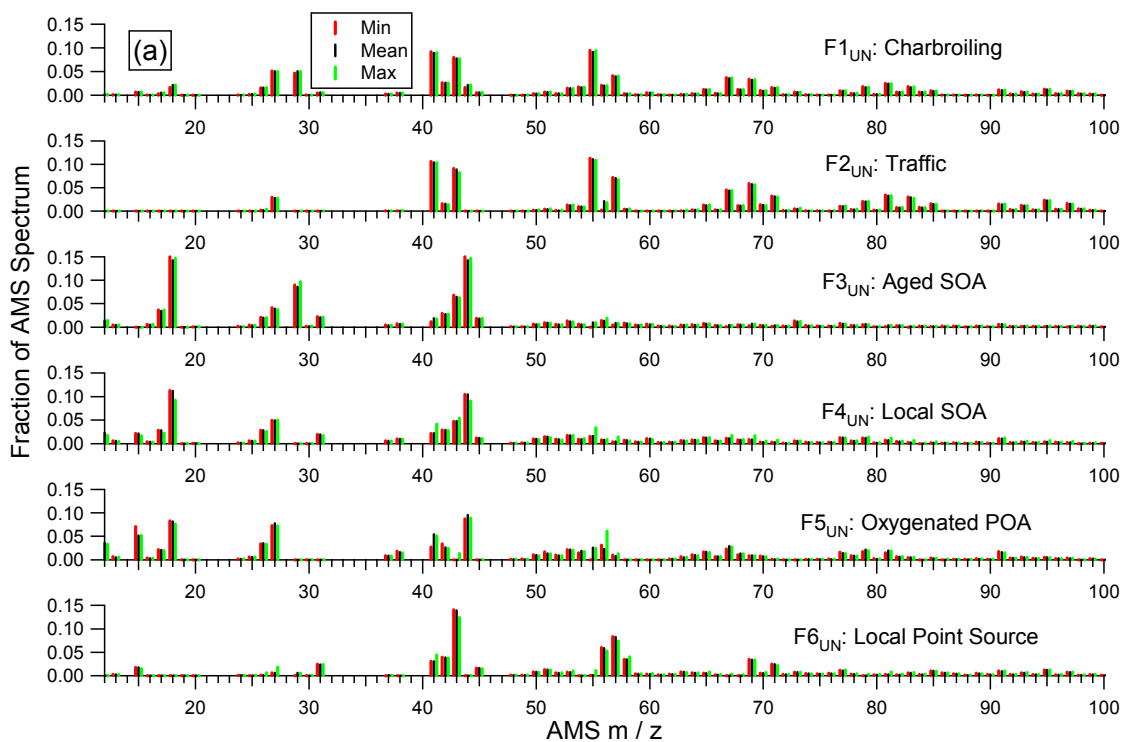

1

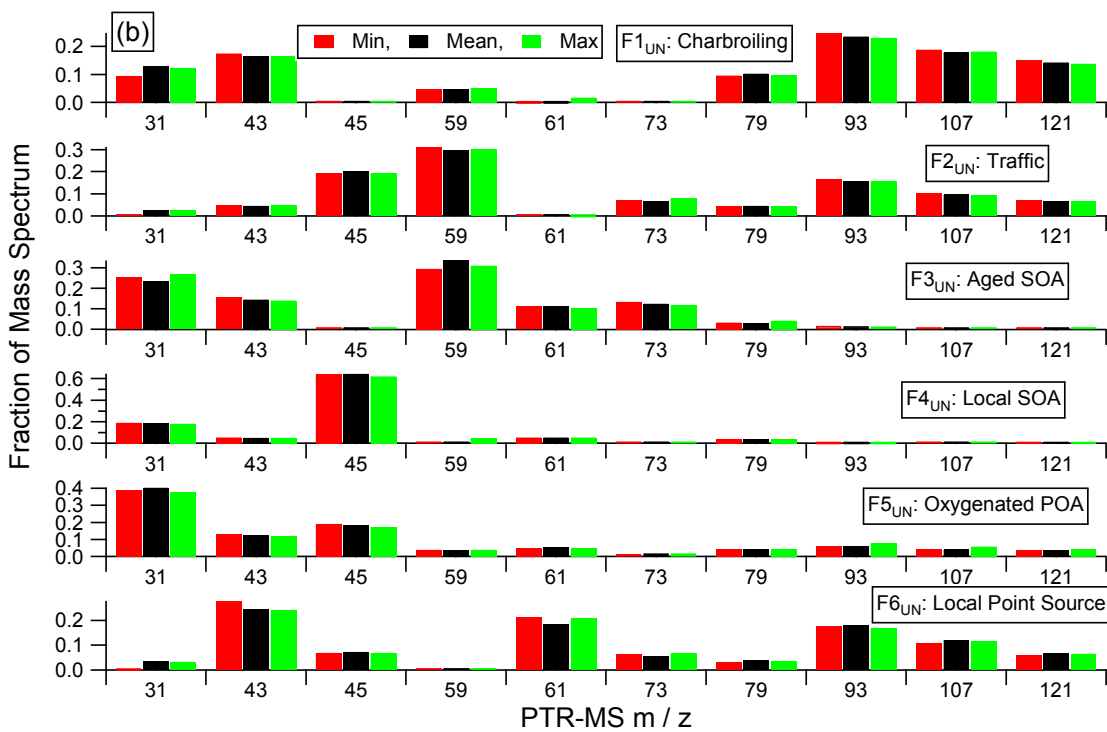

2

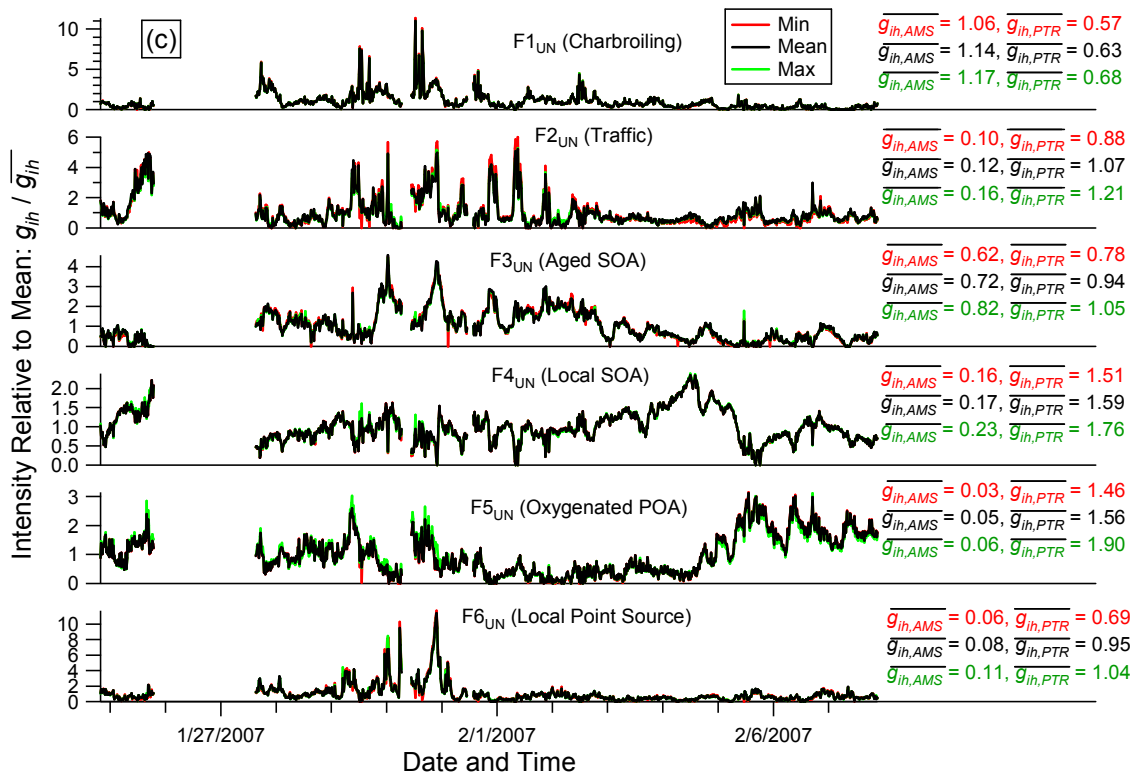

1

2 Figure S8. Factor mass spectra (a,b) and time series (c) for the 6-factor solution to the  
 3 unified dataset for 98 convergent runs generated from 100 random starting points. The  
 4 mean, maximum, and minimum values for each  $m/z$  and time point are shown. Units for  
 5  $\overline{g_{ih,AMS}}$  and  $\overline{g_{ih,PTR}}$  are  $\mu\text{g}/\text{m}^3$  and ppbv, respectively.

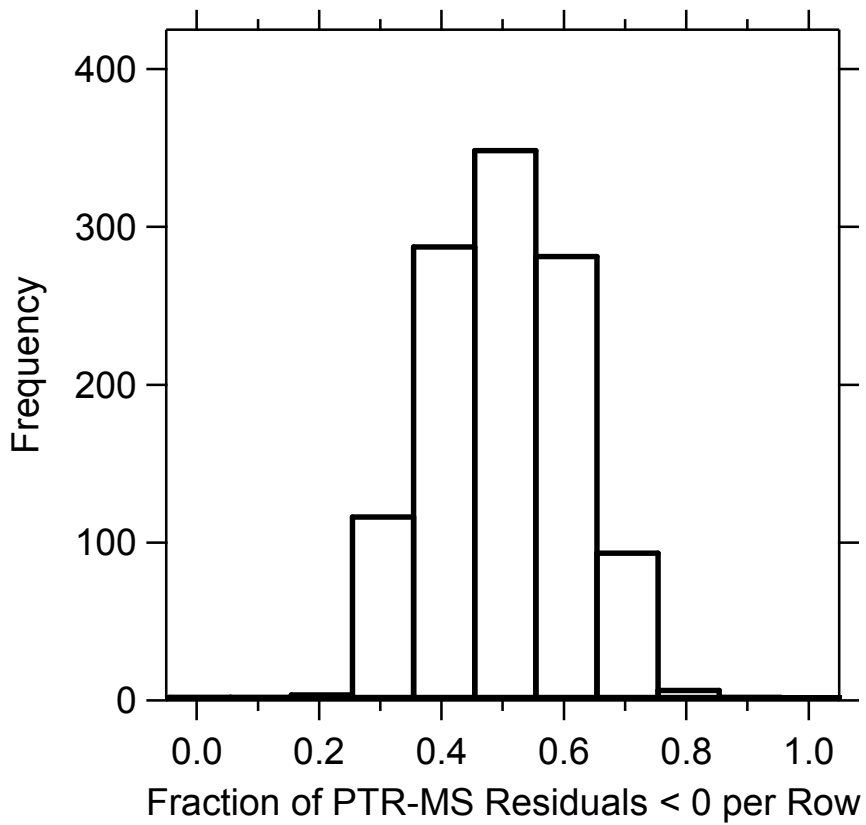

1

2 Figure S9. Frequency of negative PTR-MS residuals per row (i.e. time point) of residual  
 3 matrix  $\mathbf{E}$ , for the solution at  $p = 6$ ,  $C_{PTR} = 10$  in the unified dataset.

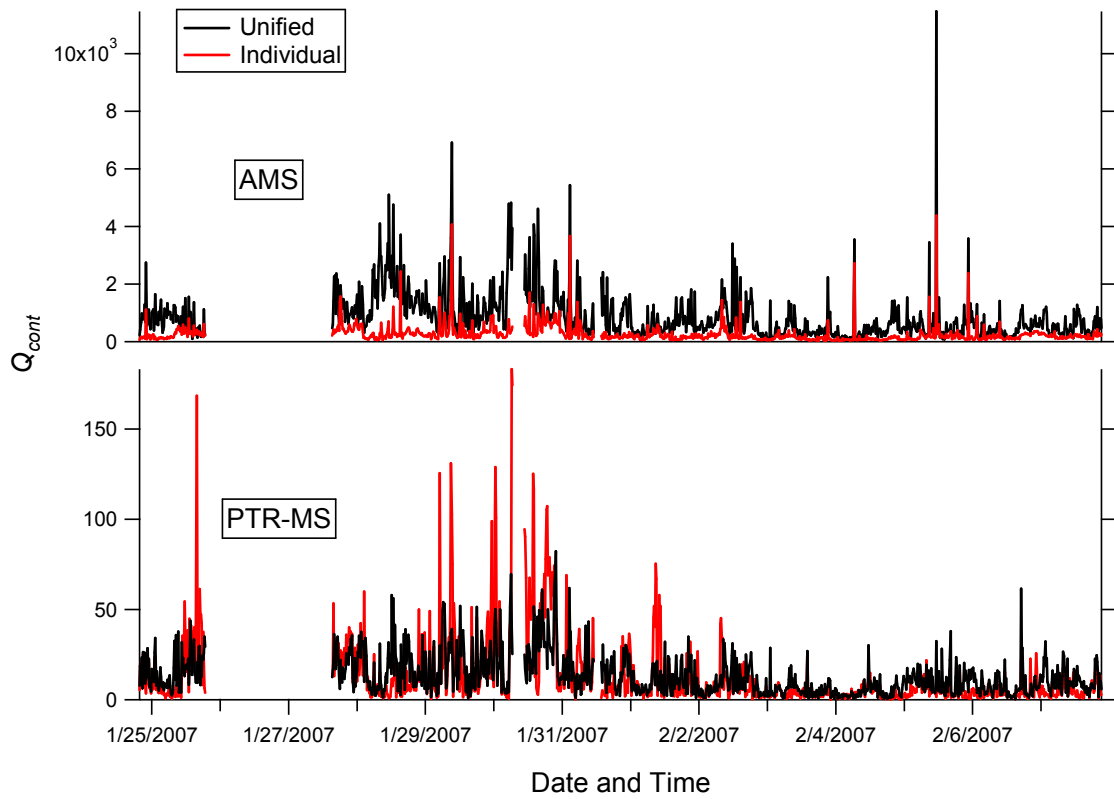

1

- 2 Figure S10. Comparison of  $Q_{cont}$  time series between the unified and individual datasets.  
 3 For comparison purposes,  $C_{PTR}$  has been removed from the unified dataset uncertainties  
 4 in the calculation of  $Q_{cont}$ .

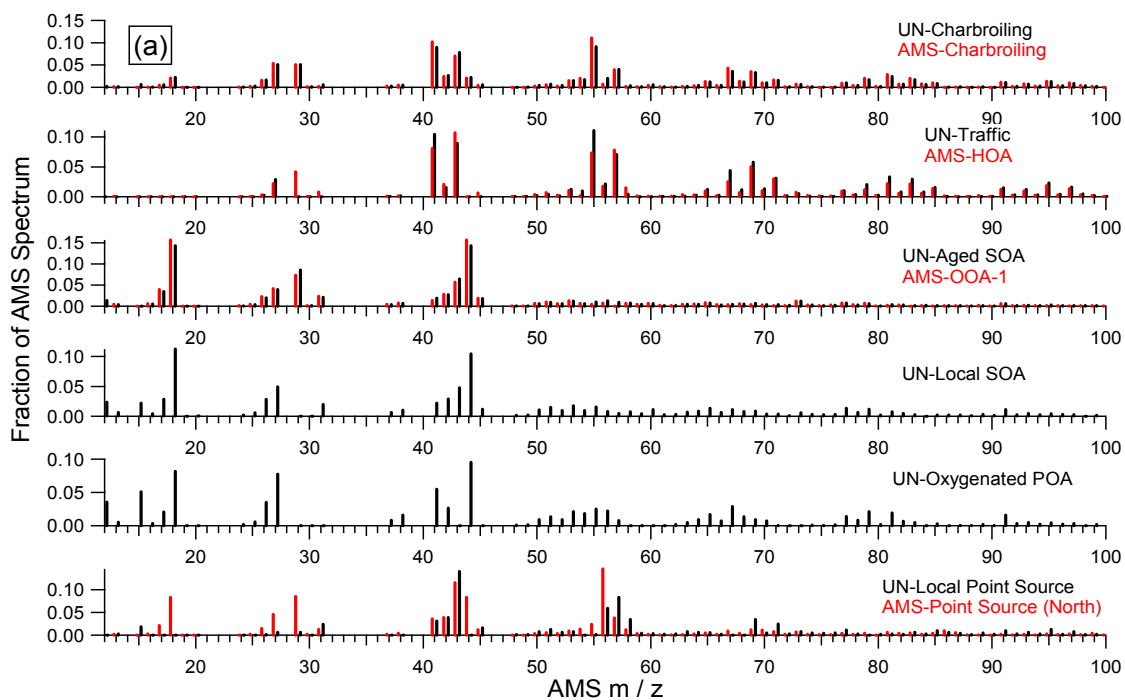

1

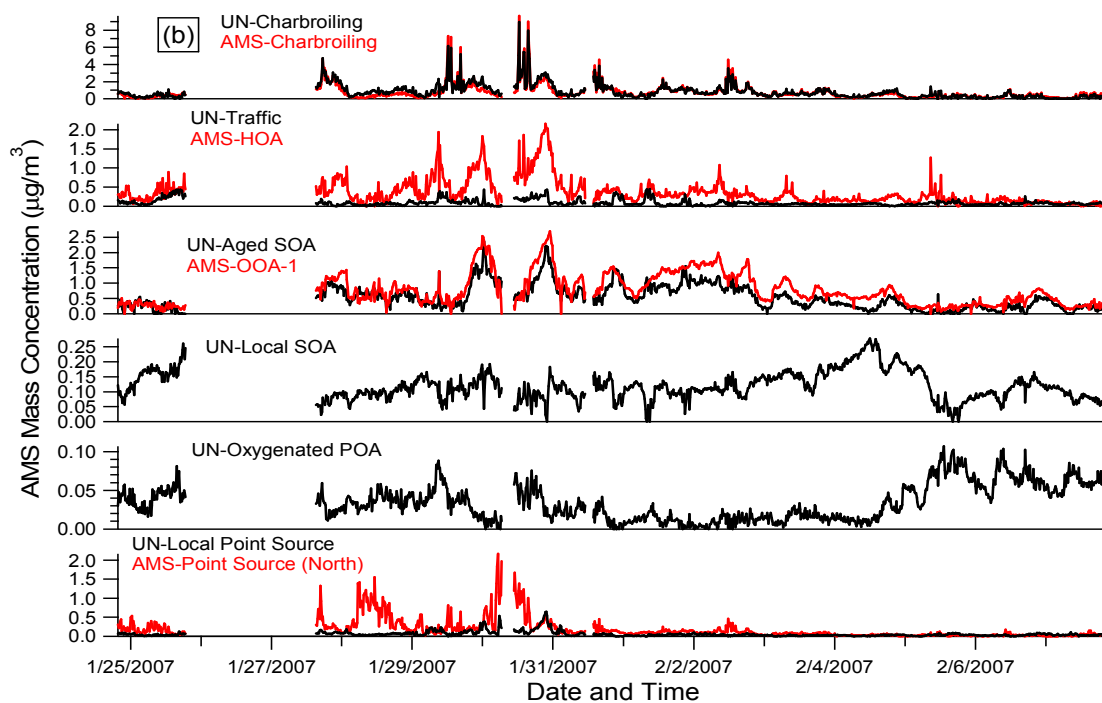

2

3 Figure S11. Comparison of solutions to the AMS ( $p = 5$ ) and unified ( $p = 6$ ) dataset  
 4 solutions. Note that the unified dataset traces shown here are in  $\mu\text{g m}^{-3}$  and are calculated  
 5 as the product of the normalized intensity and the AMS normalization factor reported in



1 Fig. 11. The AMS-biomass burning factor is not related to any factor in the unified  
2 dataset and is therefore excluded from this comparison.

3

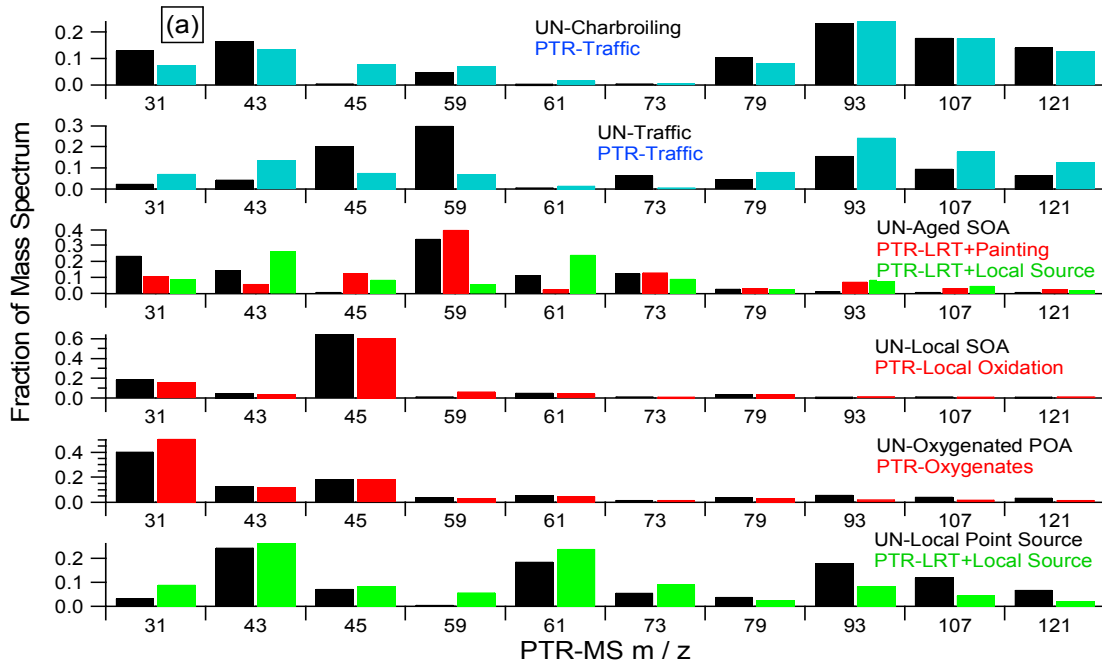

4

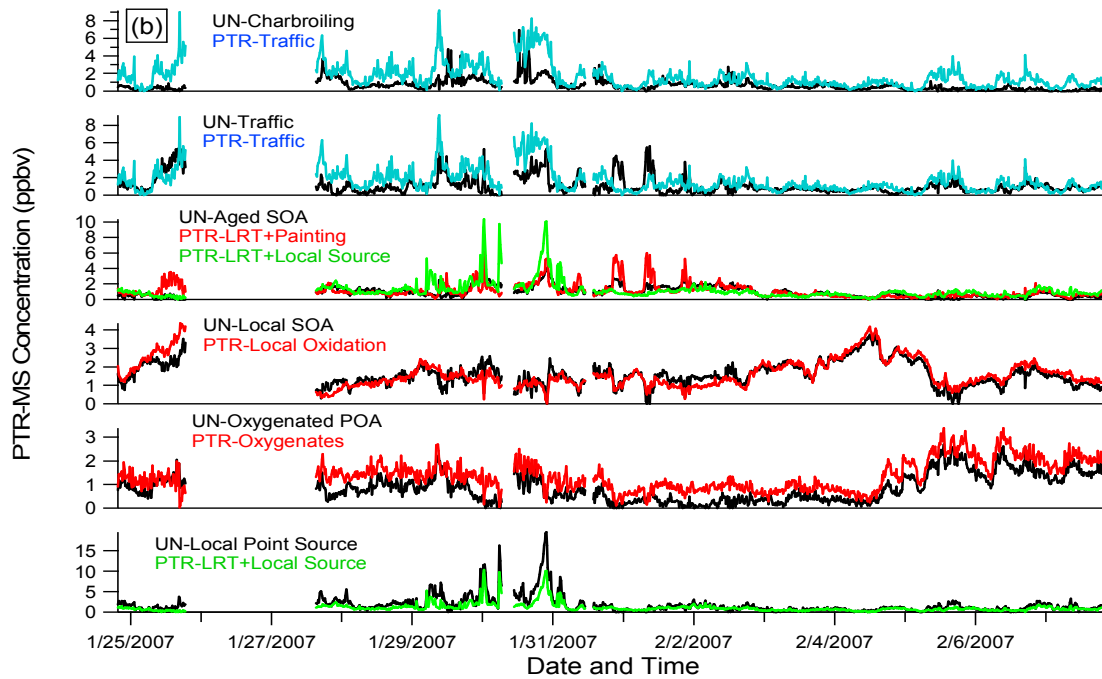

5

1 Figure S12. Comparison of solutions to the PTR-MS ( $p = 5$ ) and unified ( $p = 6$ ) dataset  
2 solutions. Note that the PTR-Traffic (blue) and PTR-LRT+Local Source factors are  
3 compared to multiple UN factors. The unified dataset time series shown here are  
4 reported in ppbv and are calculated as the product of the normalized intensity and the  
5 PTR-MS normalization factor reported in Fig. 11.

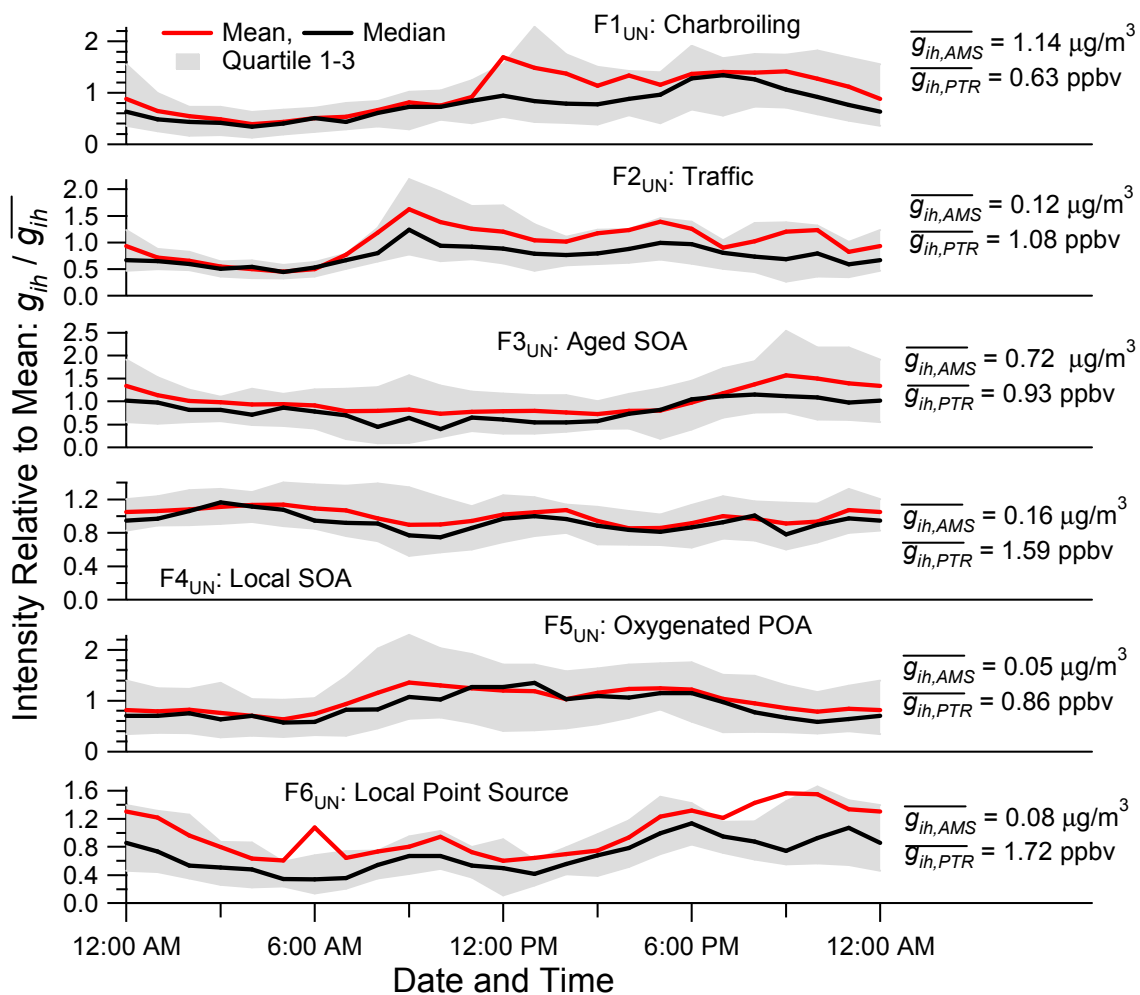

1

2 Figure S13. Hourly mean (red) and median (black) factor concentrations for the unified  
 3 dataset. Gray shading indicates the region bounded by the 1<sup>st</sup> and 3<sup>rd</sup> quartiles.

4

5

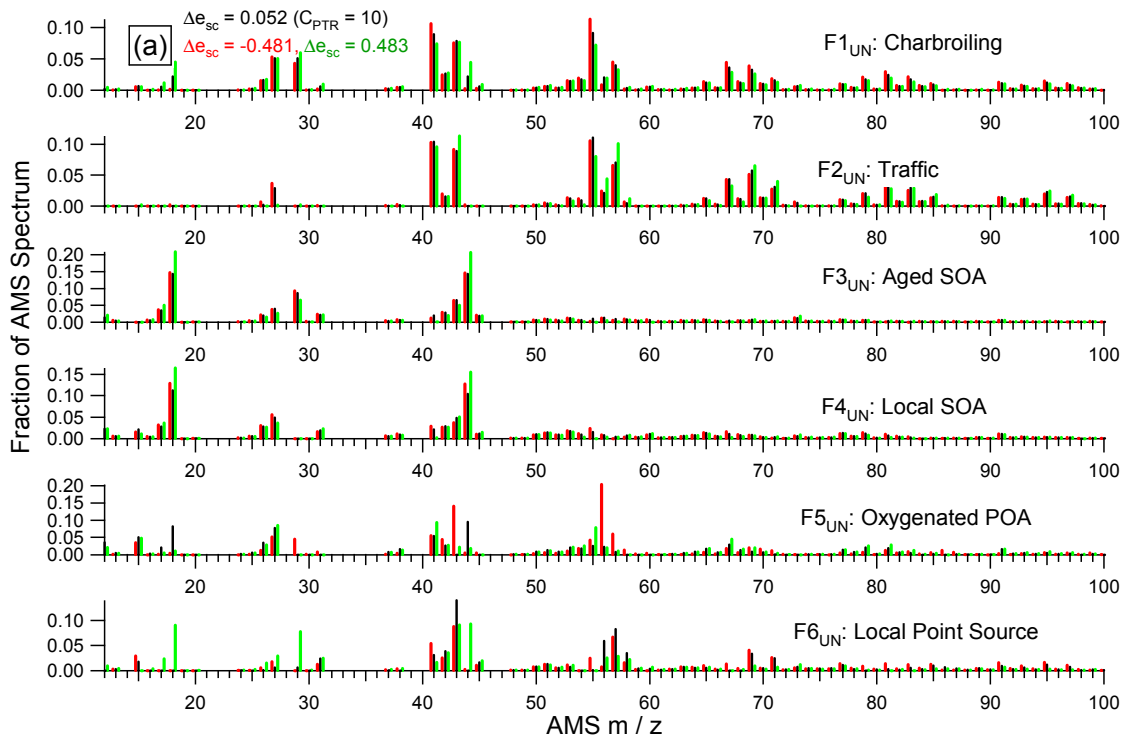

1

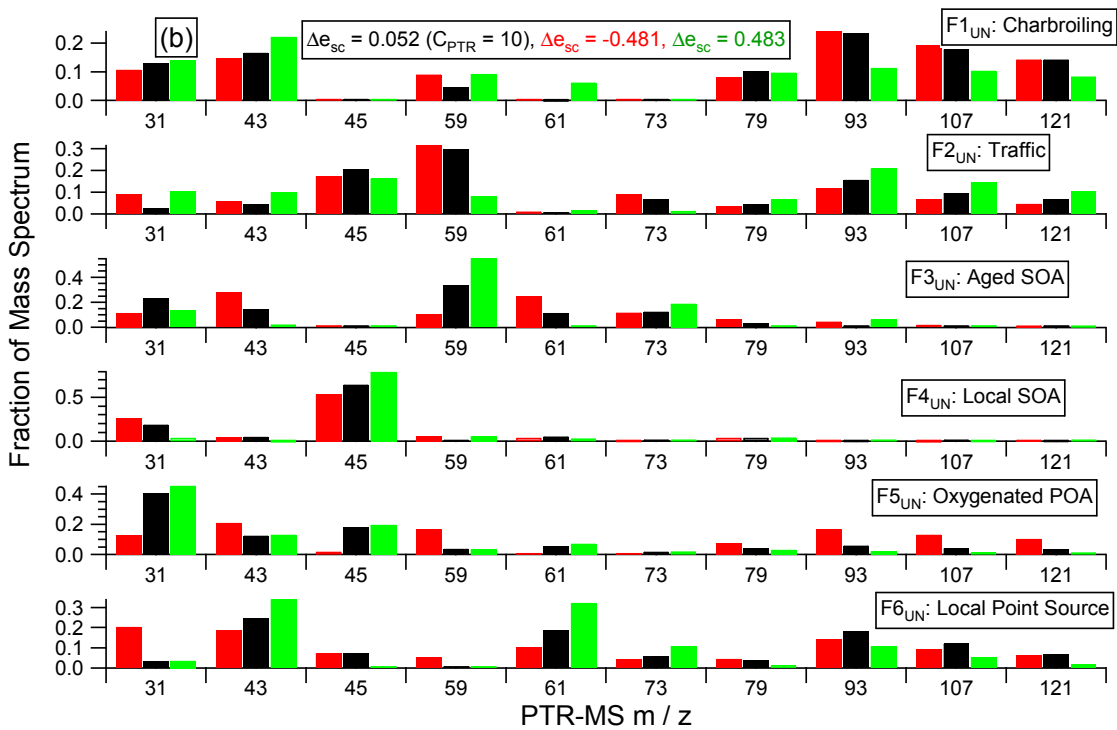

2

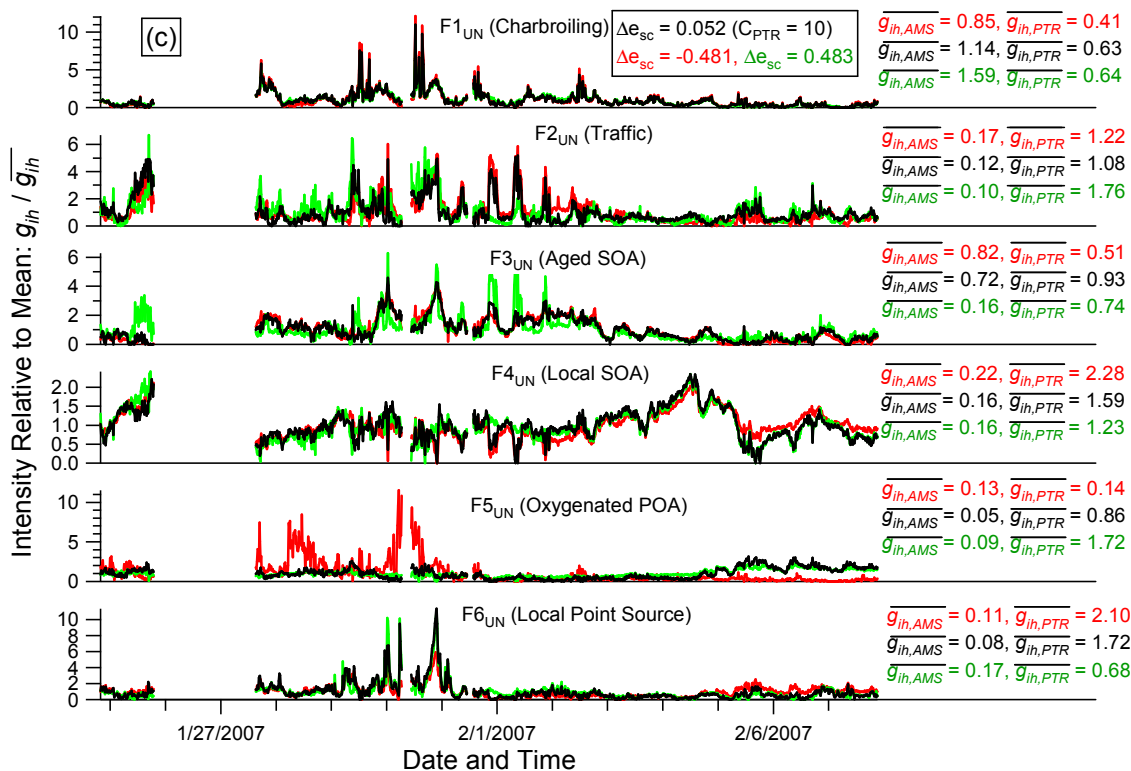

1

2 Figure S14. Factor mass spectra (a,b) and time series (c) for the 6-factor solution to the

3 unified dataset at  $\overline{\Delta e_{sc}} = -0.481$  ( $C_{PTR} = 4$ , red),  $\overline{\Delta e_{sc}} = 0.052$  ( $C_{PTR} = 10$ , black), and

4  $\overline{\Delta e_{sc}} = 0.483$  ( $C_{PTR} = 30$ , green). Units for  $\overline{g_{ih,AMS}}$  and  $\overline{g_{ih,PTR}}$  are  $\mu\text{g}/\text{m}^3$  and ppbv,

5 respectively.

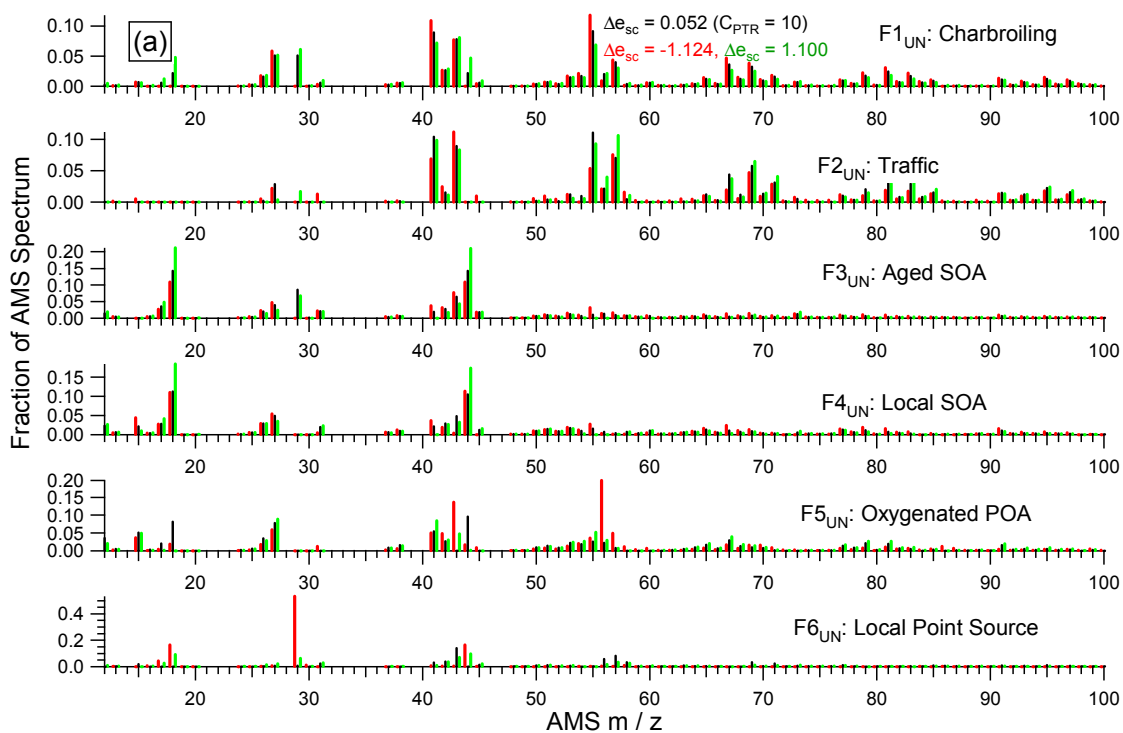

1

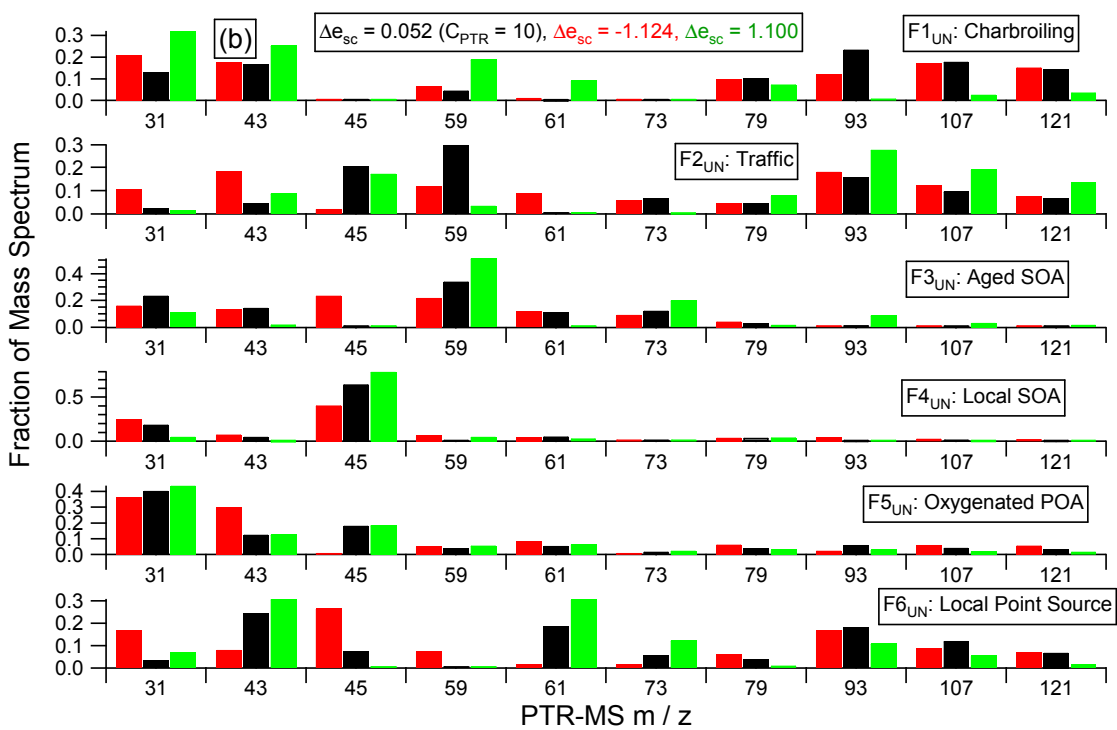

2

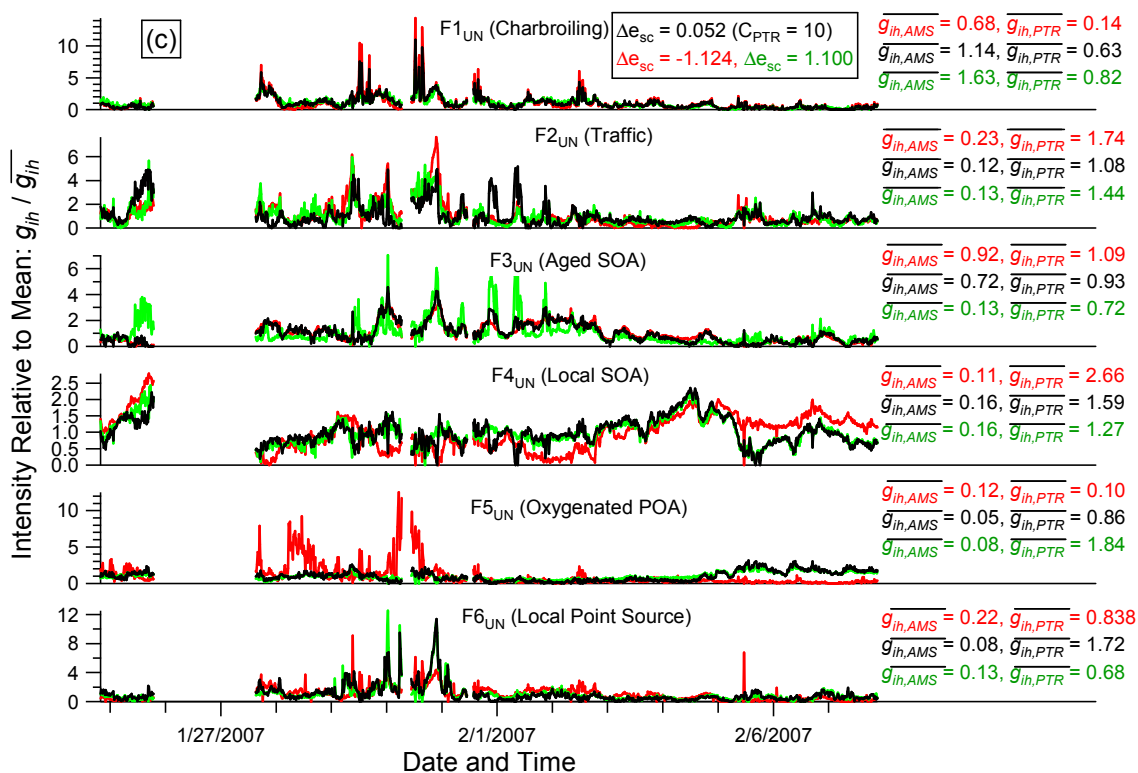

1

2 Figure S15. Factor mass spectra (a,b) and time series (c) for the 6-factor solution to the  
 3 unified dataset at  $\overline{\Delta e_{sc}} = -1.124$  ( $C_{PTR} = 2$ , red),  $\overline{\Delta e_{sc}} = 0.052$  ( $C_{PTR} = 10$ , black), and  
 4  $\overline{\Delta e_{sc}} = 1.100$  ( $C_{PTR} = 52$ , green). Units for  $\overline{g_{ih,AMS}}$  and  $\overline{g_{ih,PTR}}$  are  $\mu\text{g}/\text{m}^3$  and ppbv,  
 5 respectively.

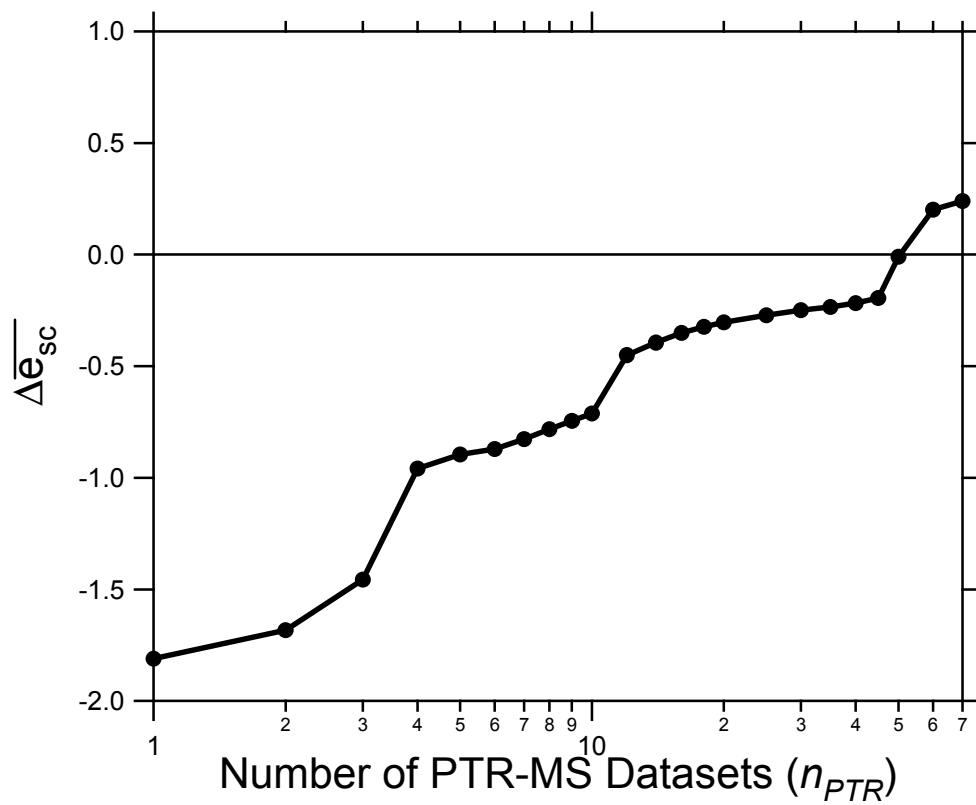



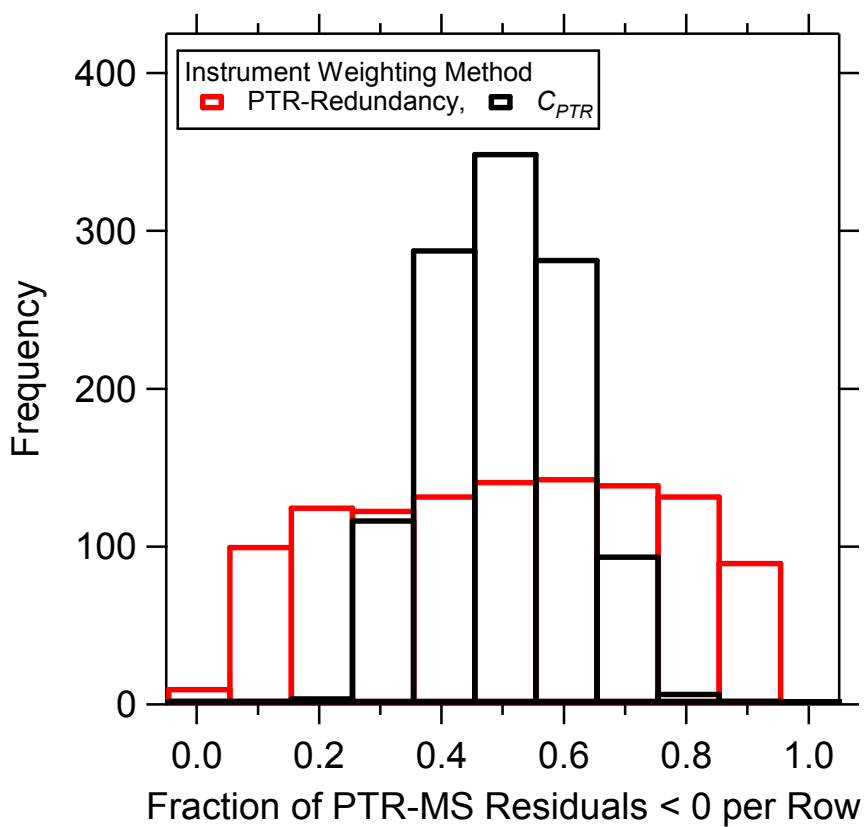

1

2

3 Figure S17. Frequency of negative PTR-MS residuals per row (i.e. time point) of  
 4 residual matrix **E**. Shown are 6-factor solutions for  $n_{PTR} = 50$  (PTR-redundancy method)  
 5 and  $C_{PTR} = 10$  (uncertainty-weighting method) for the unified dataset.

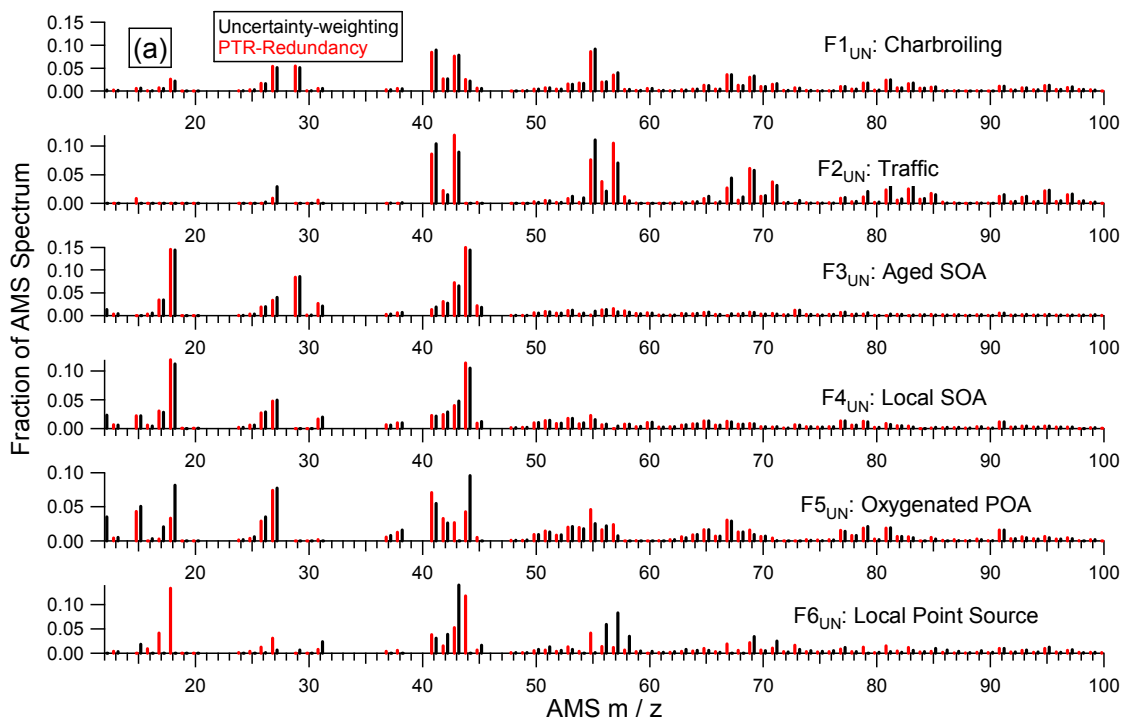

1

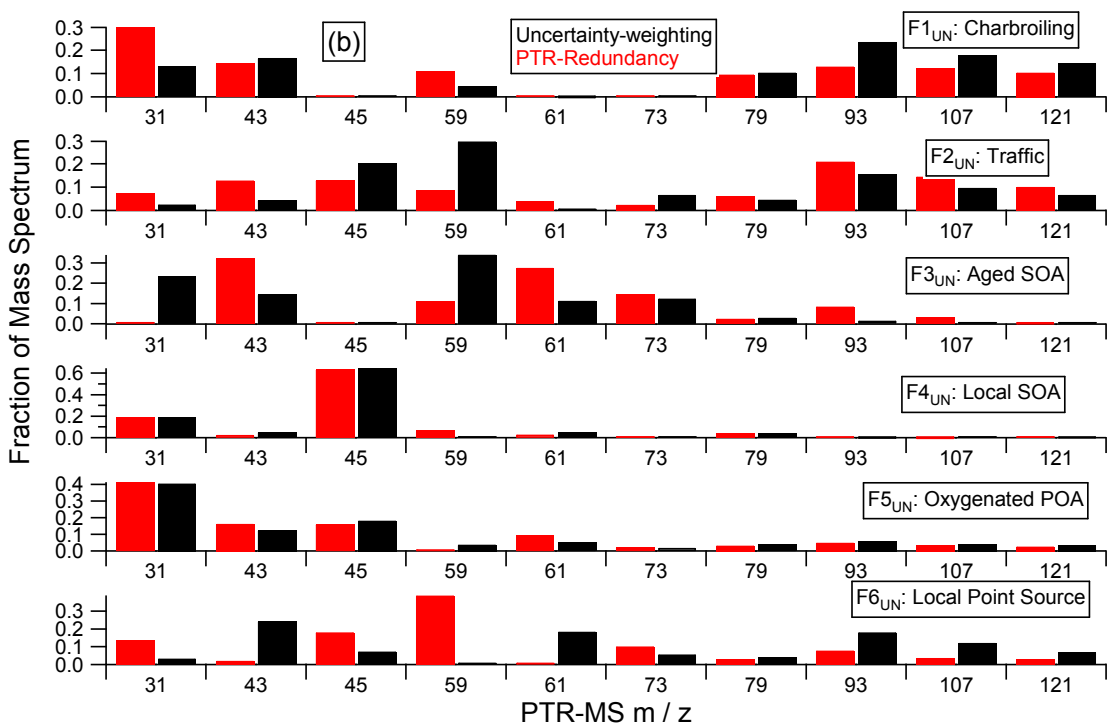

2

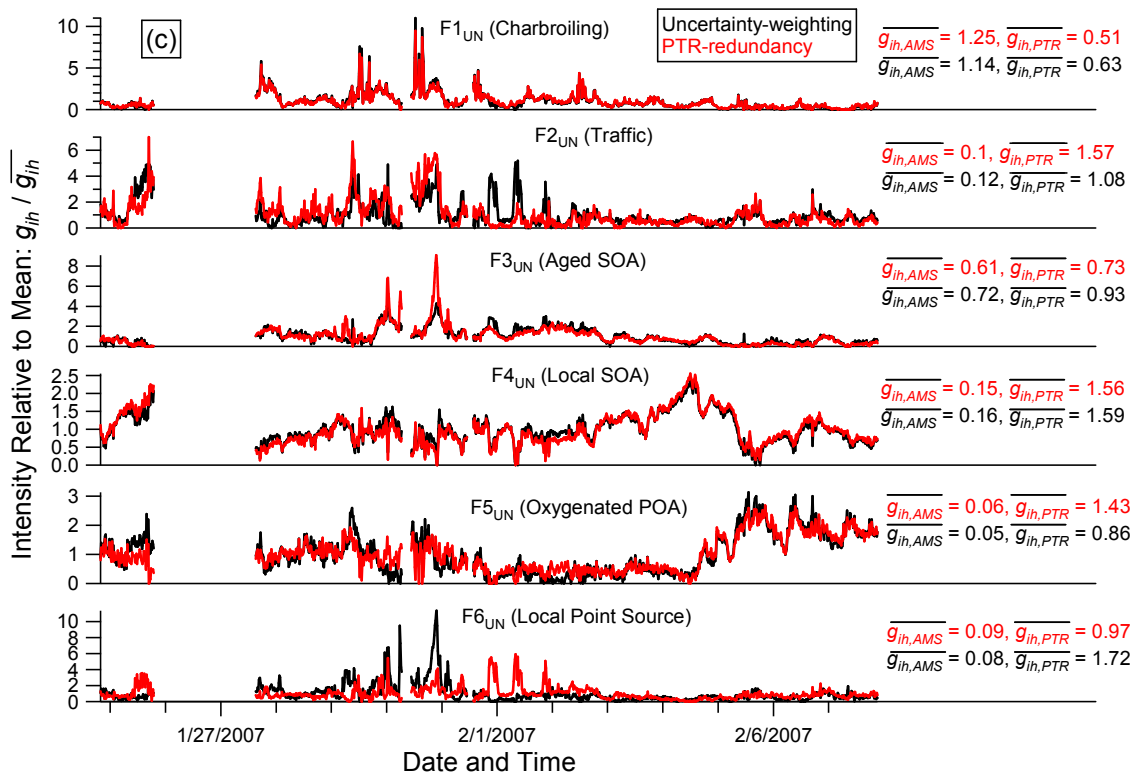

1

2 Figure S18. Comparison of factor mass spectra (a,b) and time series (c) for the 6-factor

3 solution to the unified dataset obtained from the uncertainty-weighting method at  $\overline{\Delta e_{sc}} =$

4  $0.052$  ( $C_{PTR} = 10$ ) and the PTR-redundancy method at  $\overline{\Delta e_{sc}} = -0.0098$  ( $n_{PTR} = 50$ ).

5

6

7

| m/z | AMS-OOA-1 | AMS-HOA  | AMS-Charbroiling | AMS-BBOA | AMS-Point Source (North) |
|-----|-----------|----------|------------------|----------|--------------------------|
| 12  | 1.69E-02  | 2.10E-08 | 6.86E-03         | 1.88E-03 | 7.58E-03                 |
| 13  | 5.01E-03  | 8.66E-04 | 4.28E-03         | 1.19E-03 | 2.22E-03                 |
| 15  | 2.53E-10  | 9.39E-10 | 6.60E-02         | 6.46E-10 | 4.66E-09                 |
| 16  | 6.29E-03  | 8.40E-07 | 2.03E-07         | 8.33E-04 | 3.33E-03                 |
| 17  | 3.93E-02  | 3.38E-07 | 6.05E-08         | 5.22E-03 | 2.08E-02                 |
| 18  | 1.57E-01  | 8.01E-08 | 1.03E-07         | 2.09E-02 | 8.32E-02                 |
| 19  | 1.87E-04  | 9.84E-07 | 6.99E-07         | 2.46E-05 | 9.87E-05                 |
| 20  | 3.14E-04  | 6.89E-07 | 4.20E-07         | 4.15E-05 | 1.66E-04                 |
| 24  | 1.68E-03  | 5.92E-06 | 1.33E-03         | 6.58E-04 | 5.35E-04                 |
| 25  | 4.85E-03  | 2.99E-04 | 4.80E-03         | 2.62E-03 | 2.03E-03                 |
| 26  | 2.31E-02  | 3.29E-03 | 2.59E-02         | 1.59E-02 | 1.44E-02                 |
| 27  | 4.20E-02  | 2.16E-02 | 5.81E-02         | 5.40E-02 | 4.52E-02                 |
| 29  | 7.35E-02  | 4.21E-02 | 3.65E-08         | 5.07E-02 | 8.52E-02                 |
| 30  | 1.74E-03  | 5.18E-04 | 9.76E-09         | 1.09E-03 | 1.86E-03                 |
| 31  | 2.32E-02  | 7.91E-03 | 1.36E-02         | 2.43E-03 | 1.28E-02                 |
| 37  | 4.63E-03  | 8.05E-04 | 5.83E-03         | 2.86E-03 | 2.17E-03                 |
| 38  | 7.66E-03  | 1.85E-03 | 1.08E-02         | 4.78E-03 | 4.08E-03                 |
| 41  | 1.40E-02  | 8.09E-02 | 5.85E-02         | 1.02E-01 | 3.62E-02                 |
| 42  | 2.84E-02  | 2.10E-02 | 3.13E-02         | 2.43E-02 | 3.90E-02                 |
| 43  | 5.71E-02  | 1.07E-01 | 5.74E-02         | 7.02E-02 | 1.15E-01                 |
| 44  | 1.57E-01  | 1.76E-07 | 1.42E-03         | 2.08E-02 | 8.28E-02                 |
| 45  | 1.93E-02  | 6.31E-03 | 7.39E-03         | 4.22E-03 | 1.16E-02                 |
| 48  | 1.16E-03  | 6.86E-04 | 1.36E-03         | 3.69E-04 | 4.19E-04                 |
| 49  | 1.38E-03  | 5.24E-04 | 1.56E-03         | 4.95E-04 | 5.83E-04                 |
| 50  | 6.91E-03  | 3.79E-03 | 9.63E-03         | 3.24E-03 | 3.55E-03                 |
| 51  | 1.00E-02  | 6.81E-03 | 1.50E-02         | 5.69E-03 | 5.53E-03                 |
| 52  | 6.57E-03  | 2.82E-03 | 9.41E-03         | 3.46E-03 | 3.80E-03                 |
| 53  | 1.34E-02  | 1.06E-02 | 2.10E-02         | 1.50E-02 | 9.40E-03                 |
| 54  | 6.98E-03  | 1.95E-03 | 1.72E-02         | 2.01E-02 | 1.34E-02                 |
| 55  | 4.89E-03  | 7.30E-02 | 5.28E-02         | 1.10E-01 | 2.37E-02                 |
| 56  | 8.22E-03  | 1.77E-02 | 2.61E-02         | 7.39E-03 | 1.45E-01                 |
| 57  | 1.30E-08  | 7.81E-02 | 2.08E-02         | 3.94E-02 | 3.82E-02                 |
| 58  | 7.20E-03  | 1.51E-02 | 2.07E-03         | 2.09E-03 | 1.22E-02                 |
| 59  | 4.67E-03  | 1.92E-03 | 2.51E-03         | 1.07E-03 | 3.52E-03                 |
| 60  | 7.10E-03  | 1.24E-03 | 1.46E-02         | 4.67E-03 | 2.09E-03                 |
| 61  | 2.43E-03  | 8.81E-04 | 3.05E-03         | 1.29E-03 | 8.17E-04                 |
| 62  | 2.32E-03  | 1.36E-03 | 2.74E-03         | 7.33E-04 | 8.34E-04                 |
| 63  | 5.02E-03  | 3.57E-03 | 6.44E-03         | 1.89E-03 | 1.50E-03                 |
| 64  | 5.47E-03  | 3.40E-03 | 8.71E-03         | 3.80E-03 | 2.78E-03                 |
| 65  | 8.45E-03  | 9.40E-03 | 1.66E-02         | 1.30E-02 | 4.90E-03                 |
| 66  | 3.79E-03  | 2.28E-03 | 7.15E-03         | 4.25E-03 | 1.93E-03                 |
| 67  | 3.90E-03  | 2.50E-02 | 2.76E-02         | 4.36E-02 | 9.36E-03                 |
| 68  | 5.85E-03  | 6.73E-03 | 1.29E-02         | 1.39E-02 | 4.10E-03                 |
| 69  | 3.75E-03  | 5.01E-02 | 2.00E-02         | 3.53E-02 | 1.21E-02                 |
| 70  | 3.13E-03  | 1.01E-02 | 7.54E-03         | 1.03E-02 | 1.14E-02                 |
| 71  | 1.58E-03  | 3.00E-02 | 8.01E-03         | 1.66E-02 | 7.50E-03                 |

|     |          |          |          |          |          |
|-----|----------|----------|----------|----------|----------|
| 72  | 2.33E-03 | 2.16E-03 | 7.48E-04 | 1.32E-03 | 2.25E-03 |
| 73  | 1.27E-02 | 7.36E-03 | 1.27E-03 | 7.05E-03 | 6.89E-03 |
| 74  | 3.44E-03 | 2.14E-03 | 2.43E-03 | 1.20E-03 | 1.82E-03 |
| 75  | 2.35E-03 | 1.87E-03 | 1.73E-03 | 6.02E-04 | 1.03E-03 |
| 76  | 2.98E-03 | 1.89E-03 | 2.17E-03 | 5.17E-04 | 1.20E-03 |
| 77  | 8.36E-03 | 9.80E-03 | 1.54E-02 | 9.46E-03 | 4.35E-03 |
| 78  | 3.95E-03 | 2.93E-03 | 7.89E-03 | 4.45E-03 | 1.98E-03 |
| 79  | 6.83E-03 | 1.18E-02 | 1.81E-02 | 2.06E-02 | 4.25E-03 |
| 80  | 1.35E-03 | 2.15E-03 | 2.82E-03 | 2.12E-03 | 4.84E-04 |
| 81  | 2.78E-03 | 2.20E-02 | 1.81E-02 | 2.86E-02 | 6.36E-03 |
| 82  | 3.44E-03 | 5.67E-03 | 6.90E-03 | 7.52E-03 | 3.92E-03 |
| 83  | 3.33E-08 | 2.13E-02 | 8.82E-03 | 2.05E-02 | 4.76E-03 |
| 84  | 2.34E-03 | 5.76E-03 | 3.04E-03 | 7.64E-03 | 2.29E-03 |
| 85  | 1.13E-03 | 1.40E-02 | 4.81E-03 | 9.79E-03 | 4.21E-03 |
| 86  | 1.99E-03 | 1.76E-03 | 9.73E-04 | 6.68E-09 | 9.84E-03 |
| 87  | 2.19E-03 | 1.22E-03 | 1.78E-03 | 7.69E-04 | 5.59E-03 |
| 88  | 8.94E-04 | 5.89E-04 | 8.10E-04 | 1.45E-04 | 7.86E-04 |
| 89  | 2.45E-03 | 2.03E-03 | 3.03E-03 | 6.65E-04 | 7.58E-04 |
| 90  | 1.31E-03 | 9.12E-04 | 1.13E-03 | 2.43E-04 | 5.28E-04 |
| 91  | 6.56E-03 | 1.22E-02 | 1.55E-02 | 1.17E-02 | 2.07E-03 |
| 92  | 2.01E-03 | 2.84E-03 | 3.80E-03 | 2.65E-03 | 6.71E-04 |
| 93  | 2.46E-03 | 9.40E-03 | 6.89E-03 | 7.80E-03 | 2.00E-03 |
| 94  | 1.79E-03 | 2.84E-03 | 3.75E-03 | 2.84E-03 | 6.47E-04 |
| 95  | 1.70E-03 | 1.88E-02 | 8.56E-03 | 1.38E-02 | 3.35E-03 |
| 96  | 2.18E-03 | 3.41E-03 | 3.78E-03 | 3.83E-03 | 1.35E-03 |
| 97  | 1.08E-03 | 1.30E-02 | 4.95E-03 | 9.83E-03 | 3.12E-03 |
| 98  | 1.65E-03 | 3.21E-03 | 2.01E-03 | 4.39E-03 | 1.34E-03 |
| 99  | 2.16E-03 | 2.09E-03 | 1.92E-03 | 2.54E-03 | 4.39E-03 |
| 100 | 8.99E-04 | 5.36E-04 | 6.42E-04 | 4.40E-04 | 8.62E-04 |

1 Table S1. Factor profiles for the 5-factor solution to the AMS dataset,  $m/z \leq 100$ .

1

| m/z | PTR-Traffic | PTR-LRT + Local Source | PTR-LRT + Painting | PTR-LRT + Local Oxidation | PTR-Oxygenates |
|-----|-------------|------------------------|--------------------|---------------------------|----------------|
| 31  | 7.23E-02    | 8.90E-02               | 1.07E-01           | 1.60E-01                  | 5.07E-01       |
| 43  | 1.35E-01    | 2.63E-01               | 5.79E-02           | 4.12E-02                  | 1.18E-01       |
| 45  | 7.60E-02    | 8.33E-02               | 1.26E-01           | 6.06E-01                  | 1.83E-01       |
| 59  | 6.99E-02    | 5.69E-02               | 3.94E-01           | 6.40E-02                  | 3.38E-02       |
| 61  | 1.57E-02    | 2.39E-01               | 2.43E-02           | 4.48E-02                  | 4.79E-02       |
| 73  | 7.33E-03    | 9.06E-02               | 1.30E-01           | 4.10E-03                  | 1.61E-02       |
| 79  | 8.04E-02    | 2.61E-02               | 3.22E-02           | 3.93E-02                  | 3.26E-02       |
| 93  | 2.41E-01    | 8.40E-02               | 7.29E-02           | 1.84E-02                  | 2.38E-02       |
| 107 | 1.76E-01    | 4.62E-02               | 3.18E-02           | 7.73E-03                  | 1.95E-02       |
| 121 | 1.26E-01    | 2.17E-02               | 2.42E-02           | 1.49E-02                  | 1.79E-02       |

2 Table S2. Factor profiles for the 5-factor solution to the PTR-MS dataset.

| PTR-MS<br>m/z | UN-<br>Charbroiling | UN-<br>Traffic | UN-Aged<br>SOA | UN-Local<br>SOA | UN-<br>Oxygenated<br>POA | UN-Local<br>Point Source |
|---------------|---------------------|----------------|----------------|-----------------|--------------------------|--------------------------|
| 31            | 1.30E-01            | 2.51E-02       | 2.34E-01       | 1.88E-01        | 4.04E-01                 | 3.38E-02                 |
| 43            | 1.66E-01            | 4.52E-02       | 1.44E-01       | 5.06E-02        | 1.25E-01                 | 2.44E-01                 |
| 45            | 2.72E-04            | 2.02E-01       | 8.60E-09       | 6.45E-01        | 1.82E-01                 | 7.27E-02                 |
| 59            | 4.59E-02            | 2.97E-01       | 3.39E-01       | 1.37E-02        | 3.80E-02                 | 3.26E-10                 |
| 61            | 1.08E-03            | 1.50E-10       | 1.13E-01       | 5.25E-02        | 5.46E-02                 | 1.85E-01                 |
| 73            | 1.56E-10            | 6.60E-02       | 1.25E-01       | 1.28E-10        | 1.87E-02                 | 5.65E-02                 |
| 79            | 1.03E-01            | 4.57E-02       | 2.92E-02       | 3.74E-02        | 4.09E-02                 | 3.90E-02                 |
| 93            | 2.34E-01            | 1.56E-01       | 1.55E-02       | 5.87E-03        | 5.96E-02                 | 1.81E-01                 |
| 107           | 1.78E-01            | 9.64E-02       | 4.51E-10       | 3.61E-10        | 4.17E-02                 | 1.21E-01                 |
| 121           | 1.42E-01            | 6.64E-02       | 1.04E-10       | 6.73E-03        | 3.57E-02                 | 6.79E-02                 |
| AMS m/z       | UN-<br>Charbroiling | UN-<br>Traffic | UN-Aged<br>SOA | UN-Local<br>SOA | UN-<br>Oxygenated<br>POA | UN-Local<br>Point Source |
| 12            | 2.24E-03            | 5.50E-09       | 1.39E-02       | 2.31E-02        | 3.55E-02                 | 8.16E-09                 |
| 13            | 1.60E-03            | 1.54E-09       | 4.38E-03       | 6.21E-03        | 5.32E-03                 | 2.92E-03                 |
| 15            | 6.71E-03            | 4.23E-10       | 7.08E-11       | 2.20E-02        | 5.07E-02                 | 1.80E-02                 |
| 16            | 9.37E-04            | 1.34E-08       | 5.58E-03       | 4.43E-03        | 3.39E-03                 | 2.29E-05                 |
| 17            | 5.82E-03            | 2.74E-09       | 3.50E-02       | 2.82E-02        | 2.08E-02                 | 2.06E-07                 |
| 18            | 2.22E-02            | 3.20E-09       | 1.43E-01       | 1.12E-01        | 8.18E-02                 | 9.63E-09                 |
| 19            | 2.78E-05            | 4.93E-08       | 1.66E-04       | 1.38E-04        | 9.36E-05                 | 2.55E-07                 |
| 20            | 4.65E-05            | 2.19E-08       | 2.80E-04       | 2.32E-04        | 1.58E-04                 | 1.49E-07                 |
| 24            | 6.72E-04            | 2.71E-09       | 1.36E-03       | 2.10E-03        | 2.00E-03                 | 2.42E-04                 |
| 25            | 2.70E-03            | 1.41E-04       | 4.12E-03       | 5.98E-03        | 6.06E-03                 | 2.30E-05                 |
| 26            | 1.63E-02            | 2.38E-03       | 2.01E-02       | 2.86E-02        | 3.51E-02                 | 1.42E-03                 |
| 27            | 5.12E-02            | 2.87E-02       | 3.96E-02       | 4.94E-02        | 7.75E-02                 | 6.65E-03                 |
| 29            | 5.12E-02            | 2.34E-10       | 8.57E-02       | 1.92E-10        | 3.29E-10                 | 6.60E-03                 |
| 30            | 1.12E-03            | 3.94E-09       | 1.82E-03       | 1.87E-09        | 3.05E-09                 | 1.63E-07                 |
| 31            | 6.18E-03            | 6.62E-10       | 2.12E-02       | 1.98E-02        | 1.20E-09                 | 2.41E-02                 |
| 37            | 2.98E-03            | 6.19E-04       | 4.08E-03       | 6.16E-03        | 8.36E-03                 | 2.08E-04                 |
| 38            | 5.25E-03            | 1.38E-03       | 6.88E-03       | 1.02E-02        | 1.59E-02                 | 9.60E-09                 |
| 41            | 8.92E-02            | 1.04E-01       | 1.93E-02       | 2.18E-02        | 5.48E-02                 | 3.13E-02                 |
| 42            | 2.66E-02            | 1.55E-02       | 2.78E-02       | 2.90E-02        | 2.63E-02                 | 3.90E-02                 |
| 43            | 7.83E-02            | 8.92E-02       | 6.49E-02       | 4.79E-02        | 1.83E-08                 | 1.39E-01                 |
| 44            | 2.23E-02            | 1.39E-09       | 1.43E-01       | 1.04E-01        | 9.55E-02                 | 1.60E-09                 |
| 45            | 6.25E-03            | 3.30E-10       | 1.83E-02       | 1.21E-02        | 2.27E-09                 | 1.62E-02                 |
| 48            | 4.99E-04            | 2.83E-04       | 1.05E-03       | 1.65E-03        | 1.00E-03                 | 1.63E-03                 |
| 49            | 6.19E-04            | 3.08E-04       | 1.22E-03       | 1.91E-03        | 1.28E-03                 | 1.26E-03                 |
| 50            | 4.04E-03            | 2.00E-03       | 6.17E-03       | 1.05E-02        | 9.41E-03                 | 8.12E-03                 |
| 51            | 6.95E-03            | 4.24E-03       | 9.06E-03       | 1.47E-02        | 1.35E-02                 | 1.29E-02                 |
| 52            | 4.20E-03            | 1.51E-03       | 5.84E-03       | 9.52E-03        | 9.03E-03                 | 5.89E-03                 |
| 53            | 1.50E-02            | 1.25E-02       | 1.24E-02       | 1.78E-02        | 2.14E-02                 | 7.61E-03                 |
| 54            | 1.72E-02            | 9.50E-03       | 6.20E-03       | 9.71E-03        | 1.83E-02                 | 2.67E-10                 |
| 55            | 9.14E-02            | 1.11E-01       | 1.02E-02       | 1.59E-02        | 2.56E-02                 | 1.52E-03                 |
| 56            | 2.05E-02            | 2.14E-02       | 1.34E-02       | 7.82E-03        | 2.22E-02                 | 5.89E-02                 |
| 57            | 4.00E-02            | 7.03E-02       | 8.86E-03       | 4.61E-03        | 7.81E-03                 | 8.25E-02                 |

|     |          |          |          |          |          |          |
|-----|----------|----------|----------|----------|----------|----------|
| 58  | 3.79E-03 | 4.42E-03 | 8.15E-03 | 7.45E-03 | 4.62E-10 | 3.45E-02 |
| 59  | 1.61E-03 | 9.21E-10 | 4.57E-03 | 4.06E-03 | 9.17E-05 | 4.55E-03 |
| 60  | 5.77E-03 | 4.13E-10 | 6.02E-03 | 1.11E-02 | 5.02E-10 | 3.77E-03 |
| 61  | 1.50E-03 | 2.12E-04 | 2.22E-03 | 2.87E-03 | 2.05E-04 | 1.81E-03 |
| 62  | 1.02E-03 | 5.33E-04 | 2.11E-03 | 3.29E-03 | 2.00E-03 | 3.10E-03 |
| 63  | 2.54E-03 | 1.14E-03 | 4.68E-03 | 6.62E-03 | 5.02E-03 | 7.83E-03 |
| 64  | 4.15E-03 | 2.72E-03 | 4.95E-03 | 8.38E-03 | 9.42E-03 | 6.01E-03 |
| 65  | 1.24E-02 | 1.26E-02 | 7.76E-03 | 1.33E-02 | 1.69E-02 | 5.76E-03 |
| 66  | 4.18E-03 | 2.87E-03 | 3.41E-03 | 6.00E-03 | 7.03E-03 | 1.83E-03 |
| 67  | 3.61E-02 | 4.38E-02 | 4.54E-03 | 1.14E-02 | 2.94E-02 | 8.78E-10 |
| 68  | 1.23E-02 | 1.16E-02 | 5.42E-03 | 7.88E-03 | 1.35E-02 | 1.29E-09 |
| 69  | 3.27E-02 | 5.76E-02 | 7.43E-03 | 8.68E-03 | 9.54E-03 | 3.41E-02 |
| 70  | 1.00E-02 | 1.34E-02 | 4.16E-03 | 3.68E-03 | 7.17E-03 | 5.27E-03 |
| 71  | 1.59E-02 | 3.13E-02 | 3.97E-03 | 3.57E-03 | 8.77E-04 | 2.46E-02 |
| 72  | 1.47E-03 | 1.56E-03 | 2.45E-03 | 1.19E-03 | 5.35E-09 | 2.73E-03 |
| 73  | 6.75E-03 | 5.09E-03 | 1.24E-02 | 5.96E-03 | 4.65E-09 | 7.76E-03 |
| 74  | 1.50E-03 | 8.18E-04 | 3.29E-03 | 3.24E-03 | 9.99E-04 | 4.90E-03 |
| 75  | 8.60E-04 | 6.87E-04 | 2.25E-03 | 2.57E-03 | 9.52E-04 | 4.34E-03 |
| 76  | 8.62E-04 | 5.90E-04 | 2.80E-03 | 3.26E-03 | 1.28E-03 | 4.96E-03 |
| 77  | 9.74E-03 | 1.02E-02 | 7.73E-03 | 1.32E-02 | 1.41E-02 | 1.14E-02 |
| 78  | 4.47E-03 | 3.63E-03 | 3.52E-03 | 6.22E-03 | 8.30E-03 | 3.30E-03 |
| 79  | 1.76E-02 | 2.06E-02 | 6.39E-03 | 1.18E-02 | 2.12E-02 | 4.65E-05 |
| 80  | 2.04E-03 | 2.32E-03 | 1.30E-03 | 2.15E-03 | 2.18E-03 | 2.09E-03 |
| 81  | 2.45E-02 | 3.34E-02 | 3.88E-03 | 7.25E-03 | 1.93E-02 | 3.02E-03 |
| 82  | 6.95E-03 | 8.01E-03 | 3.48E-03 | 4.94E-03 | 6.94E-03 | 2.02E-03 |
| 83  | 1.74E-02 | 2.94E-02 | 1.94E-03 | 2.76E-03 | 5.02E-03 | 6.17E-03 |
| 84  | 6.66E-03 | 8.10E-03 | 2.56E-03 | 4.85E-10 | 3.19E-09 | 3.03E-03 |
| 85  | 9.18E-03 | 1.52E-02 | 2.13E-03 | 1.94E-03 | 3.01E-03 | 1.00E-02 |
| 86  | 1.02E-03 | 7.07E-04 | 2.17E-03 | 1.94E-03 | 4.49E-09 | 6.52E-03 |
| 87  | 1.35E-03 | 1.26E-09 | 2.33E-03 | 1.87E-03 | 9.56E-04 | 4.36E-03 |
| 88  | 3.14E-04 | 3.14E-09 | 8.78E-04 | 1.05E-03 | 4.74E-04 | 1.72E-03 |
| 89  | 1.04E-03 | 5.26E-04 | 2.31E-03 | 3.39E-03 | 1.88E-03 | 4.98E-03 |
| 90  | 4.30E-04 | 2.46E-04 | 1.22E-03 | 1.45E-03 | 6.74E-04 | 2.33E-03 |
| 91  | 1.12E-02 | 1.50E-02 | 6.29E-03 | 1.13E-02 | 1.61E-02 | 9.78E-03 |
| 92  | 2.62E-03 | 3.40E-03 | 1.89E-03 | 2.74E-03 | 3.43E-03 | 2.85E-03 |
| 93  | 7.25E-03 | 1.21E-02 | 2.74E-03 | 4.53E-03 | 5.00E-03 | 6.46E-03 |
| 94  | 2.75E-03 | 3.18E-03 | 1.71E-03 | 2.82E-03 | 2.79E-03 | 2.65E-03 |
| 95  | 1.25E-02 | 2.28E-02 | 2.94E-03 | 4.15E-03 | 4.76E-03 | 1.24E-02 |
| 96  | 3.58E-03 | 4.32E-03 | 2.11E-03 | 3.04E-03 | 2.68E-03 | 2.20E-03 |
| 97  | 8.90E-03 | 1.59E-02 | 1.90E-03 | 2.66E-03 | 3.28E-03 | 7.51E-03 |
| 98  | 3.86E-03 | 4.68E-03 | 1.70E-03 | 5.33E-09 | 5.03E-05 | 1.59E-03 |
| 99  | 2.62E-03 | 2.18E-03 | 2.31E-03 | 1.65E-03 | 2.29E-03 | 2.30E-03 |
| 100 | 5.29E-04 | 3.94E-04 | 8.91E-04 | 6.86E-04 | 1.76E-04 | 9.92E-04 |

1 Table S1. Factor profiles for the 6-factor solution to the UN dataset. AMS  $m/z \leq 100$  are  
2 shown.
